## 29 **Abstract**

30 This article presents the study protocol for a randomized controlled trial (RCT)  
31 investigating the impact of singing on the brain activity of premature infants in the  
32 Neonatal Intensive Care Unit (NICU). The study focuses on how the differentiation  
33 of voices, as defined by the fundamental frequency (F0) shaped by biological sex  
34 and kinship, influences neurophysiological responses when measured by  
35 electroencephalography (EEG). Premature infants, who are highly sensitive to  
36 auditory stimuli, may benefit from music-based interventions; however, there is  
37 limited understanding of how voice variations between male and female  
38 caregivers, and whether they are biologically related, affect brain activity. Our  
39 protocol outlines a structured intervention where infants are exposed to singing by  
40 four facilitators - a male music therapist, a female music therapist, the mother, and  
41 the father - and includes two singing stages: a sustained note (A at 440 Hz) and a  
42 90-second lullaby, both interspersed with silent periods to allow for baseline  
43 measurements. EEG recordings track brain activity throughout these sessions,  
44 followed by quantitative EEG (qEEG) analysis and thorough statistical  
45 computations (e.g., mixed-effects models, spectral power analysis, and post-hoc  
46 tests) to explore how these auditory stimuli influence brain function. Preliminary  
47 data from five infants show that maternal singing elicits the highest delta spectral  
48 power in all measured conditions except during the 'lullaby song', where paternal  
49 singing elicits the highest effects followed by the male music therapist and then the  
50 mother. These early findings highlight the potential influence of parental voices,  
51 particularly the fathers' voice, on neonatal brain development, while the detailed

52 study protocol ensures rigor and replicability, providing a robust framework for  
53 future research. Additionally, this protocol lays the groundwork for exploring the  
54 long-term effects of music-based interventions, with the goal of improving  
55 neurodevelopmental outcomes in premature infants through tailored auditory  
56 stimulation. (clinicaltrials.gov unique identifier: NCT06398912)

57

## 58 **Introduction**

59 In the evolving landscape of neonatal neurology, the focus has increasingly shifted  
60 towards understanding the complex interplay between the environment and the  
61 developmental outcomes of neonates, especially those in critical care settings  
62 (Blackburn, 1998; Santos, Pearce, & Stroustrup, 2015; Bonkowsky, deVeber,  
63 Kosofsky, & Child Neurology Society Research Committee, 2020). Globally, a  
64 significant number of newborns (just over 13 million) are born prematurely, and  
65 many of these vulnerable infants spend their early, formative days in Neonatal  
66 Intensive Care Units (NICUs) (World Health Organization, 2022). Advances in  
67 neonatal medicine have dramatically improved the survival rates of these infants  
68 (e.g., Qattea et al., 2022; Gebreheat & Teame, 2022) yet challenges persist in  
69 ensuring their long-term neurological health and development.

70 Structured sound interventions, approached as non-pharmacological  
71 supplementary treatments, have shown promise in improving health outcomes for  
72 this vulnerable population in the context of the NICU. For example, white noise has  
73 been found to mimic the intrauterine environment, aiding in the stabilization of  
74 sleep patterns and reducing stress responses in premature infants (Akiyama et al.,

75 2021). The use of heartbeat sounds has also been instrumental in providing a  
76 rhythmic and familiar auditory stimulus to these infants, facilitating physiological  
77 regulation and promoting a sense of security (Zhang & He, 2023; Alemdar &  
78 Özdemir, 2017). Similarly, environmental sounds, such as gentle rain or soft wind,  
79 have been shown to create a soothing and more natural auditory environment,  
80 contributing to the reduction of the clinical and mechanical noise of the NICU  
81 (Iyendo, 2017; Praskach, 2009; Almadhoob & Ohlsson, 2020). Finally, passive  
82 listening to more organized sounds or music has been widely documented to  
83 enhance infants' physiological and emotional well-being (Papatzikis et al., 2024a),  
84 with studies demonstrating the positive effects of music on stress reduction, pain  
85 management, and weight gain (Pölkki & Korhonen, 2012; Caine, 1991; Arnon et  
86 al., 2006; Loewy et al., 2013).

87

## 88 **Delivering (live) music interventions in the NICU**

89 While NICUs are pivotal for medical care, they also introduce infants, especially  
90 the premature ones, to unique sensory environments (Reuter et al., 2023; Brown,  
91 2009; Vicencio et al., 2023). These environments differ significantly from the  
92 acoustical environment of the mother's womb or the typical domestic environment,  
93 and can profoundly influence developmental processes (Kvaratskhelia et al., 2023;  
94 Chung et al., 2020; Cook et al., 2023). Therefore, the prescription and  
95 implementation of music in NICUs should adhere to tailored and sensitive  
96 intervention protocols based on well-studied (Papatzikis et al., 2023) and biology-

97 based facts (Papatzikis, 2024) to avoid disrupting the developmental trajectory of  
98 the infant and potentially act as a developmental catalyst.

99 For instance, regarding the administration of any sound stimulus in the NICU  
100 context, careful moderation is expected to prevent overstimulation and ensure the  
101 maintenance of physiological stability in neonates. The extreme sensitivity of  
102 premature infants to auditory stimuli necessitates that all sound related stimuli in  
103 the NICU should adhere to certain acoustical regulations as defined by specific  
104 regulatory medical bodies or global standards (White et al., 2013; EFCNI, Sizun,  
105 Hallberg, et al., 2018). These regulations are designed not only to prevent adverse  
106 fluctuations in vital signs such as heart rate and respiration – ultimately resulting  
107 in stress responses in the infant – but also to optimize the therapeutic benefits of  
108 environmental and intentionally administered sound stimuli. Additionally, they aim  
109 to minimize potential disruptions to proper biomechanical development, such as  
110 damage to the hair cells in the infant's inner ear. These specialized ear cells are  
111 very sensitive to apoptosis events and can take place due to excessive sound  
112 stimulation (Hu et al., 2000; Kamio, Watanabe, & Okubo, 2012; Gerhardt &  
113 Abrams, 2000).

114 Furthermore, the timing of sound-related interventions should be strategically  
115 planned not only to align with each infant's individual feeding and sleep-wake  
116 cycles (Bueno & Menna-Barreto, 2016) – as these factors can potentially interfere  
117 with the beneficial effects of musical interventions – but also to ensure they occur  
118 during quieter periods in the NICU, allowing for safe and effective delivery  
119 (Almadhoob & Ohlsson, 2020). In particular, live singing interventions must be

120 carefully calibrated and monitored to stay within safe sound limits set by medical  
121 regulations (see EFCNI, Sizun, Hallberg, et al., 2018). These regulations generally  
122 stipulate that sound levels outside the incubator should not exceed a continuous  
123 average of 45-50 dB, with transient peaks not surpassing 65 dB. Unfortunately,  
124 even highly trained professional singers, when attempting to maintain the lowest  
125 possible sound pressure levels (SPLs), may still exceed these limits. A study by  
126 Akerlund & Gramming (1994) found that trained female singers could only produce  
127 minimum SPLs around 51.5 dB at low pitches, which already slightly exceeds the  
128 upper recommended continuous sound level in NICUs.

129 Finally, a seamless integration of any musical intervention into the infants' overall  
130 care regimen requires close coordination with the medical team, as this  
131 collaborative effort is vital for aligning the intervention sessions with the already  
132 established medical protocols and tailoring them to meet the specific health  
133 requirements and medical conditions of each infant (Kuo et al., 2018). Such  
134 integration helps to ensure that the music intervention sessions are not only safe  
135 but also effectively support the broader therapeutic goals set forth by the  
136 healthcare providers, which especially in this sensitive and demanding in terms of  
137 physical development context require the parental involvement as another critical  
138 aspect according to the latest clinical research (Dokkum, Fagan, Cullen, & Loewy,  
139 2023; Haslbeck & Bassler, 2020).

#### 140 **The role of Kinship in the NICU Singing process**

141 Prematurity poses significant risks to child development on social, behavioral, and  
142 cognitive levels (Guidry-Jorgensen et al., 2011). Most importantly, the early bond

143 between the biologically related caregiver and the infant is crucial for the latter's  
144 cognitive development, influencing the child's self-representation and future  
145 interpersonal relationships (Borghini et al., 2006; Vrticka & Vuilleumier, 2012).  
146 However, in the NICU, the typical biological processes of feeding, caring, and  
147 bonding are often disrupted due to the infant's medical complexities, leading to  
148 stress for both infants and parents (Shoemark et al., 2015).

149 Infant attachment issues are prevalent among parents who have undergone  
150 significant trauma, impairing their sensitivity towards their baby and heightening  
151 their vigilance about the baby's condition (Coppola et al., 2007; Shoemark et al.,  
152 2015). Research indicates that premature infants often exhibit more passive  
153 behavior, less positive affect, and reduced facial expressions during their  
154 interactions with their biological caregivers (Bozzette, 2007). Correspondingly,  
155 parents of premature infants tend to be less sensitive in these interactions,  
156 negatively impacting the infant's developmental trajectory (Field, 1995; Forcada-  
157 Guex et al., 2006; Muller-Nix et al., 2004). Conversely, sensitive caregiver attitudes  
158 and parent-infant synchronization during interactions have been shown to be  
159 protective and beneficial for the development of premature infants (Forcada-Guex  
160 et al., 2006; Newnham et al., 2009; Treyvaud et al., 2012).

161 In this context, singing can serve as a parent-infant synchronization intervention,  
162 fostering emotional bonds and providing comfort to both infants and their parents  
163 (Lense, Shultz, Astésano, & Jones, 2022; Fancourt & Perkins, 2018). Additionally,  
164 singing in the NICU can stabilize an infant's physiological state, including heart  
165 rate and breathing, and promote better sleep patterns (Kobus et al., 2021;

166 Yakobson et al., 2021). It can also serve as a conduit for emotional expression and  
167 connection, offering a sense of normalcy and control for parents who might  
168 otherwise feel helpless in the highly medicalized environment of the NICU. As a  
169 result, through singing, parents can engage in meaningful interaction with their  
170 infants, reinforcing their role as primary caregivers and fostering a secure  
171 attachment (Shoemark et al., 2015).

172 However, parents are not the only caregivers in the NICU, and for this reason they  
173 are not the only ones who may be able to provide singing sessions. Multiple  
174 research studies have shown that caregivers with no immediate kinship – like  
175 nurses, physicians and other clinical staff – can also effectively use singing to  
176 support developmental and medical outcomes (Liu et al., 2023). This dynamic is,  
177 of course, complex and influenced by factors such as the differentiation of kinship  
178 and the recognizability of the caregiver's voice. The fundamental frequency of their  
179 voice, which differs from that of the mother and father, may be less familiar to the  
180 infant (Spence & Freeman, 1996; Mills & Melhuish, 1974; Mai et al., 2012).

## 181 **The Fundamental Frequency of Singing**

182 In the context of the NICU, understanding the technical features of the singing  
183 voice, including its fundamental frequency (F0) as opposed to pitch, becomes  
184 increasingly vital, not only due to the auditory sensitivity of premature infants but  
185 also because of the developing nature of their central nervous system, which is  
186 highly susceptible to the variability of external stimuli as they grow older.



187 The fundamental frequency (measured in Hertz) refers to a physical property of  
188 sound waves – specifically, the number of vibrations per second produced, for  
189 example, by the violin string or, in our case, the vocal cords (Hirst & De Looze,  
190 2021; Gerhard, 2003). Pitch, on the other hand, is the perceptual correlate of  
191 fundamental frequency; it describes how the brain interprets and perceives the  
192 fundamental frequency (Hirst & De Looze, 2021). While F0 is an objective  
193 measurement, pitch is a more subjective experience; however, for most periodic  
194 sounds, the fundamental frequency closely corresponds to the perceived pitch  
195 (Hirst & De Looze, 2021; Gerhard, 2003). As a result, F0 is often used as a proxy  
196 for pitch in acoustic analysis and research.

197 Given the critical role of fundamental frequency (F0) in shaping the auditory  
198 environment for infants, particularly in a singing context, it is important to  
199 understand the differences in F0 between male and female voices. These  
200 differences, driven by anatomical factors such as the length of the vocal tract and  
201 the size of the laryngeal cavities, result in male voices typically having a lower F0  
202 – around 100-120 Hz – compared to the higher F0 of female voices, generally in  
203 the 200-220 Hz range (Titze, 1989; Coleman, 1976; Fant, 1966). Such distinctions  
204 may influence how infants respond to structured sound stimuli, especially in light  
205 of the well-documented human sensitivity to voice discrimination based on  
206 biological sex (Latinus & Taylor, 2012). The fundamental frequency serves as the  
207 foundation upon which harmonic structures are built, guiding the singing  
208 experience and creating a scaffold for the infant's brain to process the embedded  
209 complex auditory information. These differences in F0, therefore, may not only

210 influence how infants respond to the singing environment in the NICU but may also  
211 convey biological and kinship-specific cues that can affect neural functioning and  
212 development in this sensitive population.

213

## 214 **Study Objectives**

215 The F0 of singing and its impact on neonatal brain development remains under-  
216 explored, particularly in the context of NICU environments. Current literature lacks  
217 detailed insights into how F0 variations, influenced by the biological sex and  
218 kinship of the singing source, affect the short-term neurophysiological responses  
219 of premature infants. Therefore, this study, aiming to address this research gap, is  
220 set to investigate the specific mechanisms through which different F0 profiles from  
221 a combination of human voices and kinship dynamics (i.e., mother, father, male,  
222 and female music therapists) influence the brain activity of NICU infants.

223 The primary research questions of this study are: *Does a structured sound and*  
224 *music-based intervention (mentioned as musical intervention from now on) from*  
225 *the two different biological sex profiles (i.e., male, female) based on their F0 result*  
226 *in a differentiated short-term electroencephalographic effect footprint in NICU*  
227 *infants? Furthermore, is there differentiation if their kinship (mother, father) with*  
228 *the newborn becomes a factor?*

229 Our research hypotheses are as follows:

230 - *H1*: We hypothesize that when premature newborns are exposed to a musical  
231 intervention provided by their mother (high fundamental frequency – biological

232 kinship) compared to the father (low fundamental frequency – biological kinship)  
233 or an unrelated male/female music therapist, they show statistically more visible  
234 short-term positive oscillatory differentiations in their brain activity.

235 - *H0*: We assume that there is no interaction between the fundamental frequency  
236 and the human profile (mother, father, man, woman) in the infant's reactions, and  
237 that neither the fundamental frequency nor the human profile has a primary effect.

238 To answer the research questions and study its hypotheses, this study will utilize  
239 electroencephalography (EEG) to monitor and analyze the brain activity of NICU  
240 infants. By comparing EEG patterns across different music delivery conditions of  
241 F0 and kinship source (i.e., music facilitators), the findings are expected to provide  
242 valuable insights that can be leveraged to enhance neurodevelopmental outcomes  
243 in premature infants.

## 244 **Methods**

### 245 *Study design*

246 Between 06.2023 and 12.2025, all premature newborns who meet the specific  
247 inclusion criteria (detailed below) in the NICU of the 'Panagiotis and Aglaia  
248 Kyriakou' Children's Hospital in Greece will be screened, and those who qualify  
249 will be invited to randomly participate in either the intervention or control group of  
250 our study. During their stay in the NICU, the music intervention group will be  
251 exposed to a structured musical intervention – including varying investigative  
252 conditions of silence and singing – for four days within one week. Meanwhile, the  
253 research team will ensure that the control group is not exposed to any musical

254 stimulation during the same period. Randomization and allocation of the eligible  
255 participants to one of the two groups (control or intervention) will be performed  
256 using a stratified randomization technique to account for parental availability (i.e.,  
257 not all parents are living in the region the intervention is taking place, or parental  
258 working schedules do not fit towards an intervention scheduling). For this reason,  
259 participants will be stratified into two groups based on whether their parents are  
260 available to participate. Within the 'available parents' stratum, participants will be  
261 randomly allocated to either the control or intervention group (by a lottery),  
262 ensuring a balanced distribution of parental availability across both groups. For  
263 the 'non-available parents' stratum, participants will be assigned only to the control  
264 group, as this group involves no active parental participation. This stratified  
265 approach ensures that the study properly tests the influence of parental  
266 involvement in the intervention group, while the control group includes infants  
267 regardless of parental availability. We believe that this randomization approach  
268 maintains the integrity of the study by ensuring a balanced group assignment,  
269 while also addressing practical and ethical considerations of the specific NICU  
270 setting. By the same token, blinding of the intervention is also difficult to implement  
271 in this research context. In terms of measurements, electroencephalography  
272 (EEG) will be used to record the newborns' brain activity throughout their  
273 participation in the research study (both intervention and control group), while  
274 video data will be also recorded, forming an auxiliary part to the EEG data  
275 collection process. The schedule of enrolment, intervention and assessment can  
276 be seen in **Figure 1** while a flowchart of the study design is shown in **Figure 2**.

277

278

279

280

281

282

283

284

285                   Figure 1. *Schedule of enrolment, intervention and assessment*

286

287                                           Figure 2. Study Protocol Flow Chart

288    In this design, although the EEG will be the primary tool of data collection and  
289    analysis, the rationale for incorporating video data is multifaceted. Firstly, the video  
290    recordings will complement the electroencephalogram (EEG) recordings in  
291    offering a comprehensive parallel view of the infants' neural and behavioral  
292    responses. Furthermore, the videos will serve as a tool for quality control by  
293    ensuring that the prescribed research protocol is uniformly followed by all  
294    facilitators, contributing to the scientific integrity of the research. Finally, the videos  
295    will allow for a later examination of any synchrony or coordinated interactions

296 between the infant and the facilitator, shedding light on phenotypical – not able to  
297 be measured by the EEG – aspects of the intervention.

298 The musical intervention will be delivered by four different profiles of individuals-  
299 facilitators: a male music therapist, a female music therapist, the mother, and the  
300 father of the newborn. During the delivery of the intervention (explained in more  
301 detail below), there will be five ‘conditions’ measured: Silence1 (180 seconds),  
302 Note A (60 seconds), Silence2 (180 seconds), Song (90 seconds) and Silence3  
303 (180 seconds).

304 It is important to note that the study protocol will be conducted in a dedicated room,  
305 largely isolated from the ambient noise typically found in the rest of the NICU. This  
306 aspect of the study design is crucial for two main reasons:

307 Firstly, it will ensure the comfort and safety of the participating newborns. All  
308 actions taken in the context of the NICU require adherence to the recommended  
309 standards for the NICU sound environment. Therefore, the importance of a well-  
310 managed acoustic environment in reducing stress and discomfort for our  
311 participating infants is of paramount importance. Such a consideration has been  
312 consistently highlighted both for clinical and research settings alike (European  
313 Standards of Care for Newborn Health; EFCNI, Sizun, J., Hallberg, B., et al., 2018)  
314 and a sound-controlled room within the NICU seems to be the only viable option  
315 for achieving the necessary level of sound management for our participants,  
316 without disrupting other clinical operations. More specifically, in the NICU context,  
317 when considering the operational sound as outlined by White, Smith, Shepley, et

318 al. (2013), the combination of continuous background sound and operational  
319 sound should not exceed an hourly  $L_{eq}$  of 45 dB and an hourly  $L_{10}$  of 50 dB, both  
320 A-weighted slow response, with transient sounds or  $L_{max}$  not exceeding 65 dB. Our  
321 study, with sound exposure lasting less than 3 minutes per hour, will strictly adhere  
322 to these guidelines. However, the transient nature of singing, distinct from the  
323 continuous and better-controlled sound pressure levels typically found in  
324 continuous speech, might lead to brief instances where we slightly exceed these  
325 thresholds by about 15 dB. According to evidence, even professional singers, and  
326 more so untrained individuals like the parents participating in our study, are not  
327 able to produce transient peak Sound Pressure Levels (SPLs) below 78-79 dB  
328 when singing softly (Boren, Roginska & Gill, 2013). Therefore, we believe that a  
329 dedicated room will significantly aid in ensuring the correct application and viability  
330 of the aforementioned recommendations – as compared to the open NICU floor –  
331 without pushing to the maximum the soundscape limits.

332 Secondly, recent research, including a study by Restin et al. (2021), indicates that  
333 incubators can be significant sources of noise, especially in the open environment  
334 of the NICU floor. To mitigate this issue, we plan to use an open cot/radiant warmer  
335 (as depicted in **Figure 3**) in the dedicated room when applicable, or alternatively,  
336 bring the entire incubator into the room. This approach will help minimize or  
337 eliminate noise from the incubator that might reach the infant. As an additional  
338 precaution to all the above, a dB measuring device will be also stationed in the  
339 dedicated room, outside the incubator where applicable, to monitor noise levels  
340 throughout the intervention.

341

342

Figure 3. Open cot – Radiant warmer

### 343 **EEG Tool, Data Collection and Processing**

344 EEG is an electrophysiological imaging tool commonly used in medicine and  
345 research. The electroencephalogram measures changes in electrical dynamics  
346 resulting from the formation of electrical dipoles during nerve stimulation. The EEG  
347 signal consists of several brain waves that reflect electrical activity in the brain,  
348 based on electrode placement and function in adjacent brain areas. EEG-based  
349 changes in response to interventions have become a popular method for  
350 investigating brain function in patients with various brain and mental health  
351 disorders, as well as in healthy individuals, while the last few years, this tool has  
352 been successfully applied to premature newborns and full-term infants, too (Wu J  
353 et al., 2013).

354 In our study, we decided to use the **nëo**<sup>™</sup> EEG monitoring unit by ANT, a  
355 specialized tool designed for both routine and advanced neonatal care in NICUs.  
356 Eight high-precision channels found on a clinical-grade infant-sized cap are  
357 applied on our participants, connected to a research-grade amplifier with an input  
358 impedance exceeding 1 GΩ and advanced noise reduction. We chose this EEG  
359 system as it supports neuroprotective intervention screening, offering a maximum  
360 sampling rate of 512 Hz and 24-bit resolution.

361 For the raw EEG data preprocessing part, we have configured a pipeline  
362 specialized for the premature infants (as shown in supplementary **file SF1**, and



363 presented in Papatzikis et al., 2024b; Papatzikis et al., 2024c; Papatzikis et al.,  
364 2024d), while for the processing part we followed and adapted to our protocol a  
365 specialized for the premature infants' population quantitative EEG (qEEG)  
366 software developed for neonatal EEG by O'Toole & Boylan (2017). This software  
367 has been selected as our preferred EEG processing tool due to its highly  
368 informative, detailed, and objective output. Coupled with our preprocessing  
369 pipeline, this tool proved to be particularly advantageous for our research, as it  
370 allowed for the analysis of various EEG features such as spectral power,  
371 coherence, and connectivity among EEG channels, taking into consideration the  
372 intervention's musical conditions and their short delivery profile. We aimed for this  
373 comprehensive EEG setup to enhance our ability to interpret the complex EEG  
374 data from our participants in greater detail, as these infants, compared to term  
375 infants, toddlers, and adults, exhibit unstable physiological and  
376 electroencephalographic states – such as signal continuity/discontinuity (Pavlidis  
377 et al., 2017; Pavlidis et al., 2020) and increased artifact generation (Wallois et al.,  
378 2021; Britton et al., 2016) – making it significantly more challenging to identify  
379 patterns and trends in the EEG data collected following our musical protocol.

380

## 381 **Participants**

382 Premature newborns who meet the inclusion criteria outlined below are eligible for  
383 participation in our study. These criteria have been carefully selected to ensure  
384 that the infants included have the appropriate health profile for safe participation

385 and that the study results will be as accurate and relevant as possible. More  
386 specifically, to be eligible, newborns must have been born at 32 weeks of  
387 gestation or less and weigh at least 1000 grams, while not exceeding 38 weeks of  
388 postmenstrual age (PMA) during the intervention and measurement period. It is  
389 essential that potential participants do not have auditory insufficiency in the 8th  
390 cranial nerve or excessive pathology in the brainstem, while they must also have  
391 negative bilateral ‘transient evoked otoacoustic emissions’ – both verified during  
392 the postnatal screening by the in-house audiologist.

393 The eligible participants must also be in stable health, with no imminent risk of  
394 death, and must not be sedated or require sedative drug administration during the  
395 study. Any congenital, genetic, or chromosomal abnormalities, neonatal sepsis, or  
396 nuclear jaundice will also lead to exclusion, as these conditions could potentially  
397 influence brain function and interfere with the study's results. Additionally, the  
398 participants must not be exposed to maternal use of illicit drugs during pregnancy,  
399 while mechanical ventilation used for their life support – that generates excessive  
400 noise, such as high-frequency oscillatory ventilation – is another exclusion  
401 criterion. Similarly, any potential participants requiring sedative drugs will not be  
402 included to avoid confounding factors related to brain activity that could alter the  
403 study's findings.

404 Should a participant be diagnosed with a disease or dysfunction during the course  
405 of the study, they will be automatically excluded if the medical staff recommends  
406 their removal for health reasons. Additionally, the study protocol mandates that no  
407 external musical stimulation, including singing, be allowed for the enrolled

408 participants during the admission period. Non-compliance with this guideline will  
409 result in the exclusion of the neonate from the study to maintain the integrity of the  
410 experimental conditions and data collection process.

411

## 412 **Power calculation and sample size**

413 In situations where an exact effect size is not derivable from prior research or pilot  
414 data – as in our case – utilizing the Minimum Effect Size of Interest (MESI) (Anvari  
415 & Lakens, 2021) is advantageous for guiding sample size estimation. This  
416 approach focuses on the smallest effect size that is considered practically or  
417 clinically significant within the specific context of a study, while it forms the  
418 foundation of the power analysis to ensure a study is calibrated to detect effects  
419 that are both meaningful and impactful.

420 For our study the MESI was established at Cohen's  $d=0.3$ . This low determination  
421 was made in consultation with field experts and by reviewing clinical guidelines  
422 pertaining our research protocol, reflecting in result the minimal change in the  
423 primary outcome that would significantly impact patient care or treatment decisions  
424 in the specific context. More specifically, with our designated MESI for the musical  
425 intervention impacting premature infants' brain activity, and by setting our alpha  
426 (Type I error) at 0.05 and power (Type II error) at 0.80, a power analysis with  
427 G\*Power 3.1.9.7 suggested – at a High-Power Scenario – that 30 participants are  
428 needed to adequately power the study to detect this minimum effect size with  
429 desired statistical certainty (Table 1).

430

Table 1. Power analysis table

|                                  |                                               |            |
|----------------------------------|-----------------------------------------------|------------|
| <b>Effect Size Specification</b> | <b>Cohens'd 1988 = 0.3</b>                    |            |
| <b>Tool</b>                      | <b>G*Power 3.1.9.7</b>                        |            |
| <b>Analysis:</b>                 | <b>A priori: Compute required sample size</b> |            |
| <b>Input:</b>                    | <b>Effect size f(V)</b>                       | <b>0,8</b> |
|                                  | $\alpha$ err prob                             | 0,05       |
|                                  | Power (1- $\beta$ err prob)                   | 0,95       |
|                                  | Number of groups                              | 2          |
|                                  | Number of measurements                        | 4          |
|                                  | Nonsphericity correction $\epsilon$           | 1          |
| <b>Output:</b>                   | Noncentrality parameter $\lambda$             | 19,2       |
|                                  | Critical F                                    | 2,7132271  |
|                                  | Numerator df                                  | 3          |
|                                  | Denominator df                                | 84         |
|                                  | <b>Total sample size</b>                      | <b>30</b>  |
|                                  | Actual power                                  | 0,9621585  |

431

432

### 433 **Intervention**

434 Preterm newborns who meet the inclusion criteria, as explained above, will be  
435 exposed to a specific, in terms of content and exposure timing, musical intervention  
436 (explained in more detail below) four times in a calendar week – once per day. By  
437 conducting the intervention in the proposed way, we expect to observe and record  
438 the immediate and short-term neurophysiological effects of the musical stimuli on  
439 the infants' brains, while ensuring that the data reflects the true impact of the  
440 intervention, free from external variables that might arise from a more prolonged  
441 or sporadic schedule. Furthermore, the specific exposure over this consistent  
442 period will facilitate a comprehensive understanding of any cumulative or evolving  
443 effects of the intervention across consecutive sessions, allowing for a detailed

444 analysis of the EEG baselines recorded each one of the four times the intervention  
445 is delivered (also explained in more detail below). It should be also noted that the  
446 facilitators' order of intervention delivery for each infant will be changed between  
447 participants to achieve better randomization and to avoid potential confounding  
448 variables due to a set order of intervention delivery.

449 As far as the musical intervention's structure is concerned, this will take place in  
450 two main singing stages complemented by three distinctive blocks of silence,  
451 before, between and after each sung session as shown in the following list.

- 452     ▪ \* 180 seconds of silence (*Silence1; Baseline1*)
- 453     ▪ 1st singing stage: Signing a specific tone at 440 Hz, repeated *ad libitum* for  
454       a total of 60 seconds. (*NoteA*)
- 455     ▪ \* 180 seconds of silence (*Silence2; Baseline2*)
- 456     ▪ 2nd singing stage: Singing an original song suitable for the NICU  
457       environment in terms of structure, acoustic information composition, and  
458       volume level (dB), with a total duration of 90 seconds. (*Song*)
- 459     ▪ \* 180 seconds of silence (*Silence3; Baseline3*)

460 We decided to introduce these periods of silence before and after each singing  
461 stage to facilitate a return to the baseline of brain activity between the two singing  
462 stages, as well as to reduce the potential impact of any residual neural activity from  
463 the previous stage. This approach will enable us to achieve a more accurate  
464 assessment of the effects of each individual singing stage, and it will also allow for  
465 a clearer comparison of the developmental trajectory of the EEG baselines. By

466 incorporating these controlled intervals of silence, we aim to isolate the  
467 neurophysiological effects specific to each musical intervention, thus providing a  
468 more precise understanding of how the infants' brain activity evolves over the  
469 course of the intervention conditions as well as sessions.

470 In regard to the singing stages, as stated above, all facilitators will be asked to sing  
471 at the same distant location from the incubator, maintaining in this way consistent  
472 spatial sound parameters of stimulus delivery. For the first stage of the singing part  
473 (NoteA), each facilitator will be given a tuning fork (a forked acoustic component  
474 that produces sound upon impact and quickly silences) tuned to the musical note  
475 A (440 Hz) and asked to sing based on its produced sound the musical note A  
476 (440 Hz) as best as they can. All facilitators will need to repeat the specific note *ad*  
477 *libitum* over 60 seconds at this stage. The tuning fork has been chosen to be used  
478 as it is a safe acoustic accessory for accurately reproducing the tone the facilitator  
479 needs to hear as an acoustical template when inserting it into their ear, ensuring  
480 at the same time that the infant will not be able to hear it and be affected by it.

481 For the second singing stage (Song), each facilitator will need to sing a complex  
482 acoustic stimulus with organized sounds in the form of a lullaby, specifically  
483 created and composed for the study by a professional musician and music  
484 therapist (a member of the research team). This lullaby was aimed to have a  
485 unique structure and acoustic information composition adhering to the known  
486 scientific evidence related to infants' sound and music perception capabilities  
487 (Háden et al., 2024; Trehub, 1987). The song lasts 90 seconds and features a soft  
488 melodic line, gentle rhythm, simple harmonies, and soft vocal timbre. Its tempo is

489 expected to be approximately 60–75 beats per minute, following the rhythm of the  
490 seconds hand of the clock found on site as best as possible for consistency of  
491 delivery.

492 Finally, to ensure the best possible implementation of the intervention – particularly  
493 regarding the singing process – all parents of participants who meet the study's  
494 inclusion criteria will receive 30 minutes of training before the actual intervention.  
495 This training will be conducted by a member of the research team who is a  
496 professional musician, singer, and music therapist. This pre-intervention session  
497 aims to equip parents with the necessary skills and understanding to enhance the  
498 intervention's effectiveness, ensuring close consistency among the different  
499 facilitators. Additionally, the training session is designed to provide a calming  
500 influence on the parents, which can reduce stress and anxiety for both the infants  
501 and their caregivers during the delivery of the intervention. We believe that this  
502 pre-intervention training will empower parents as active participants in their child's  
503 care, improving adherence and contributing to a more supportive and therapeutic  
504 environment throughout our study in the NICU.

505

## 506 **Protocol Amendments**

507 The study protocol reported here is the second version, following several  
508 adjustments made for both practical and scientific purposes. A process evaluation  
509 of the RCT was carried out in line with established medical research guidelines  
510 (French et al., 2020) and the findings informed a series of recommendations, which

511 were incorporated into the current study design. A detailed account of the  
512 evaluation process as well as the changes made from the original protocol can be  
513 found in [Dimitropoulos \(2025\)](#).

514

## 515 **Outcomes and Statistical analysis**

516 To rigorously evaluate the effects of our musical intervention, we decided to  
517 employ a series of advanced statistical methods tailored to the specificities of the  
518 study design and data characteristics. As a result, the complete analysis was  
519 structured to address the research questions, focusing on the EEG-based outcome  
520 measures, with an emphasis on Spectral Power and Spectral Entropy, across the  
521 Delta frequency band.

522 Special attention was given to the Delta frequency band as it is widely recognized  
523 for its relevance in neonatal brain activity (van't Westende et al., 2022; Bourel-  
524 Ponchel et al., 2021). The Delta frequency band, typically ranging from 0.5 to 4  
525 Hz, is the slowest of the EEG frequency bands and is a critical marker of brain  
526 maturation. Higher absolute power in the delta frequency band has been  
527 associated with more favorable long-term neurodevelopmental outcomes,  
528 reflecting the progression of underlying neural processes during early  
529 development (van't Westende et al., 2022). Given its prominence in this context,  
530 we believe that the Delta frequency band can be an essential marker for assessing  
531 the impact of sound and music on the neurophysiological state of our participants,



532 providing in result critical insights into how these infants process auditory stimuli  
533 and the extent to which our intervention influences brain activity patterns.

534 More specifically to the design of our statistical analysis process and given the  
535 study's repeated measures design and the nested data structure (with multiple  
536 observations per infant), a mixed-effects model was decided to be employed to  
537 analyze first the Delta Spectral Power, allowing for the inclusion of both fixed  
538 effects (conditions and facilitators) and random effects (variability across individual  
539 infants), while also meticulously fitting the model to account for the inter-individual  
540 variability after isolating the impact of the different intervention conditions and  
541 facilitator profiles. Specifically, to the Spectral Power approach, we decided to  
542 focus on this EEG feature as it can provide information about the intensity and  
543 prevalence of different types of neural oscillations (Gao, 2016) and it can help us  
544 better understand how the fluctuating premature infant brain activity changes over  
545 time. The thorough statistical analysis approach we propose here on the Delta  
546 Spectral Power is expected to generate fixed and random effects estimates, while  
547 to further elucidate the specific differences between condition/facilitator  
548 combinations, a Least Significant Difference (LSD) post-hoc test will be also  
549 conducted on the model's outcome, aiming to identify which specific pairs of  
550 conditions or facilitators exhibit significant differences in brain activity, despite the  
551 increased risk of Type I errors due to multiple comparisons.

552 Parallel to the analysis of Delta Spectral Power, a similar mixed-effects model will  
553 be applied to the Delta Spectral Entropy data collected, following the same  
554 consideration for random and fixed effects, and aiming to explore how variations

555 in spectral entropy, influenced by the different intervention profiles, reflect the  
556 neurophysiological responses of the infants. We decided to further study the EEG  
557 feature of Spectral Entropy in this context as it can offer a different dimension of  
558 analysis compared to Spectral Power and reflect in more detail the overall  
559 organization and complexity of the oscillations studied through the Delta Spectra  
560 Power approach. More specifically, Spectral Entropy is considered a measure of  
561 the complexity or irregularity of a signal's frequency distribution (Kapucu et al.,  
562 2016), quantifying the degree of disorder or unpredictability within the power  
563 spectrum of a specific signal – in our case the Delta frequency band. A decrease  
564 in Spectral Entropy could indicate a transition to more synchronized and less  
565 complex neural activity, while conversely, higher Spectral Entropy might suggest  
566 more distributed and diverse neural activity, which could be linked to alertness or  
567 cognitive engagement.

568 Infusing this extra step of statistical analysis on our collected EEG data may be  
569 proved particularly valuable because it may reveal subtle changes in brain activity  
570 that may not be apparent through power analysis alone. As with the Spectral  
571 Power analysis, and subsequent to the mixed-effects model for Delta Spectral  
572 Entropy, a Least Significant Difference (LSD) post-hoc test will be also employed  
573 to investigate the differences between condition/facilitator combinations as in the  
574 previous approach.

575

576 **Ethics**

577 This study has been meticulously designed with a strong commitment to ethical  
578 standards, ensuring the protection and well-being of all participants. The research  
579 protocol has been thoroughly reviewed and approved by the 'Panagiotis and Aglaia  
580 Kyriakou' Hospital's Scientific Council , under the Institutional Review Board (IRB)  
581 with protocol number 11333, 09th/04-05-2023 (Θ: 9). Additionally, the study has  
582 been registered on the clinical trials platform ([www.clinicaltrials.gov](http://www.clinicaltrials.gov)) under the  
583 unique identifier NCT06398912, ensuring transparency and adherence to global  
584 research standards.

585 Participation in this study is entirely voluntary, and informed consent is a central  
586 component of the ethical process. Therefore, parents of identified premature  
587 infants who meet the inclusion criteria are invited to a detailed one-on-one meeting  
588 with the research team (NICU director), in order to receive comprehensive  
589 information, both orally and in writing, regarding the study's objectives,  
590 methodologies, and procedures. This meeting covers all aspects of the  
591 intervention and data collection, including the non-invasive nature of the research  
592 tools, such as music and EEG, while also addresses any concerns related to  
593 selection, participation, withdrawal, confidentiality, and the study timeline, ensuring  
594 that parents are fully informed before making a decision.

595 During this meeting, the voluntary nature of participation is emphasized, with  
596 parents being assured that their decision to participate or withdraw at any point will  
597 not affect their relationship with the researchers or the medical staff at the  
598 Panagiotis & Aglaia Kyriakou Children's Hospital. They are also informed that in

599 the event of withdrawal, all data associated with the participant will be immediately  
600 deleted, ensuring no residual information remains.

601 Considering the sensitivity of the particular context, and to further protect the  
602 participants' privacy and confidentiality, all collected data are de-identified and  
603 pseudonymized at the source (i.e., embeded function of the **nēo**<sup>™</sup> EEG monitoring  
604 unit during the extraction process), with each dataset assigned a unique  
605 identification number. Personal identifiers, such as names, are not linked to the  
606 data in any study analysis, report, or publication phase, while parents are informed  
607 of their right to access the data collected from their infants at any time. Once  
608 parents have received all relevant information and have had their questions  
609 answered, they are asked to provide written consent, indicating their agreement to  
610 participate in the study.

611 At this point, we should mention that despite its non-invasive nature, the study  
612 recognizes potential risks, such as the overstimulation of infants due to sound  
613 exposure and stress related to handling. To mitigate these risks, sound levels are  
614 closely monitored using a dB dosimeter – as already mentioned – and  
615 interventions are scheduled in this way so to ensure adequate rest periods for the  
616 infants. It has already been pointed above that the study is conducted in a specially  
617 designated, quiet room within the NICU to minimize stress, while moreover, the  
618 application of EEG electrodes, a key part of the study, is performed by specialists  
619 trained in neonatal care, further reducing the risk of discomfort or stress for the  
620 infants. In case of any unforeseen medical complications or adverse reactions, the  
621 study protocol includes provisions for the immediate cessation of the intervention  
622 and prompt medical evaluation, ensuring the safety of the participants.

623

## 624 **Trial status**

625 Since the ethical approval by the IRB and the Hospital Scientific Board in May  
626 2023, 16 participants have been randomized and measured in our study – 11 in  
627 the experimental group and five in the control group. However, data from only five  
628 participants from the experimental group have been analyzed so far, comprising  
629 the basic participants workforce whereupon the EEG data pre-processing and  
630 processing pipelines, as well as the statistical analyses framework were first  
631 implemented. This small analysis cohort is consisted by two female and three male  
632 premature infants ranging between 28 and 32 weeks of gestation (i.e., specifically

633 199-227 days of gestation; SD = 12.42 days; Median (75<sup>th</sup> Percentile) = 227 days).

634 All five participants were measured in their 35th week PMA.

635 Prematurity in this dataset is underscored by the diverse maternal histories,  
636 including one mother who underwent in vitro fertilization (IVF) resulting in  
637 dichorionic diamniotic (DCDA) twin pregnancy (described as uneventful); a mother  
638 with an IgA nephropathy and a kidney transplantation, coupled with diabetes  
639 during pregnancy; one case involving increased resistance in the uterine arteries,  
640 raising concerns about potential intrauterine growth restriction (IUGR) and  
641 preeclampsia, and one last case experiencing a pregnancy complicated by IVF,  
642 gestational diabetes, polyhydramnios, and abnormal Doppler findings. Regarding  
643 the infants' treatment, antibiotics and caffeine were commonly administered  
644 (typical neonatal care practices employed), with three cases receiving a standard  
645 combination of antibiotics and caffeine, while one case specifically involved  
646 ampicillin and gentamicin alongside caffeine. In one instance, no medication was  
647 reported, indicating a lack of need for such intervention.

648 In terms of the EEG analysis results for this dataset, the descriptive statistics for  
649 spectral power in the Delta frequency across different facilitators and conditions  
650 are detailed in **table 2** below. The highest mean spectral power was observed  
651 during maternal interventions, particularly in the 'NoteA' condition (Mean = 1381.3  
652  $\mu V^2$ , SD = 1794.5  $\mu V^2$ ), emphasizing the notable influence of maternal presence in  
653 general.

654

655 Table 2. Descriptive statistics for Spectral Power on Delta frequency (in  $\mu V^2$  for Mean and SD)

| Facilitator | Condition | Mean   | Standard Deviation | Coefficient of Variation (%) |
|-------------|-----------|--------|--------------------|------------------------------|
| Elena       | NoteA     | 276.1  | 269.9              | 97.7                         |
| Father      | NoteA     | 657.1  | 937.4              | 142.7                        |
| Kyriakos    | NoteA     | 273.6  | 129.5              | 47.3                         |
| Mother      | NoteA     | 1381.3 | 1794.5             | 129.9                        |
| Total       | NoteA     | 647.1  | 1047.2             | 161.8                        |
| Elena       | Silence1  | 92.7   | 83.4               | 90                           |
| Father      | Silence1  | 161.2  | 175.8              | 109.1                        |
| Kyriakos    | Silence1  | 339    | 308.7              | 91.1                         |
| Mother      | Silence1  | 703.1  | 745.9              | 106.1                        |
| Total       | Silence1  | 324    | 451.8              | 139.4                        |
| Elena       | Silence2  | 114.8  | 162.3              | 141.4                        |
| Father      | Silence2  | 148.7  | 103.3              | 69.4                         |
| Kyriakos    | Silence2  | 225.7  | 137.3              | 60.9                         |
| Mother      | Silence2  | 218    | 168.8              | 77.4                         |
| Total       | Silence2  | 176.8  | 141.6              | 80.1                         |
| Elena       | Silence3  | 94.3   | 84.6               | 89.7                         |
| Father      | Silence3  | 427.6  | 785.9              | 183.8                        |
| Kyriakos    | Silence3  | 378.3  | 538.1              | 142.2                        |
| Mother      | Silence3  | 1020.7 | 1797.1             | 176.1                        |
| Total       | Silence3  | 480.2  | 995.9              | 207.4                        |
| Elena       | Song      | 79.1   | 76.2               | 96.4                         |
| Father      | Song      | 574.2  | 920.8              | 160.4                        |
| Kyriakos    | Song      | 270.2  | 231.8              | 85.8                         |
| Mother      | Song      | 213.4  | 185.7              | 87                           |
| Total       | Song      | 284.2  | 482.5              | 169.8                        |

656

657 Following the descriptive statistics, and before running the mixed-effects model as  
658 already planned, an assumptions check was performed, creating a Q-Q plot to  
659 check for the normality of residuals and running the Breusch-Pagan test to check  
660 for any violation of homoscedasticity in the dataset. The Q-Q plot, as shown in  
661 **figure 4**, confirmed that the residuals followed an approximately normal  
662 distribution, while the Breusch-Pagan test for homoscedasticity resulted in a p-  
663 value of 0.066, suggesting on the one hand that the variance of residuals is  
664 consistent across different levels of the fixed effects, and indicating on the other  
665 hand that the assumption of homoscedasticity holds.

666

667 Figure 4. Q-Q Plot of Residuals with a reference point to the female music  
668 therapist for the facilitators and the 'Silence1' condition for the five intervention  
669 conditions

670

671

672 Considering the model assumptions to hold, we run first the mixed-effects model  
673 on the Spectral Power of the Delta frequency as decided, which included 100  
674 observations across 5 groups, with each group comprising 20 observations at  
675 multiple time points. The model converged successfully with a scale parameter of  
676 404,270.9768 and a log-likelihood of -739.3134. The coefficients for each condition  
677 and facilitator, along with their standard errors and p-values, are reported in full in  
678 **table 3**. The model revealed a significant effect of the 'facilitator' parameter on  
679 spectral power [  $F(3,88) = 3.627, p = 0.016$  ], while the 'condition' parameter did



680 not show a statistically significant sole effect overall [ $F(4,88) = 1.669, p = 0.164$ ].  
681 On the contrary, when we combined the effects across different conditions and  
682 facilitators (please see interaction plot in [figure 5](#)), the model revealed that  
683 although the Delta Spectral Power generally fluctuates, some interesting findings  
684 can be drawn based on this synthesis.

685

686 Table 3. Coefficients for each condition and facilitator with SE and  $p$  values

| Condition/Facilitator | Coefficient (Mean) | Standard Error | p-value |
|-----------------------|--------------------|----------------|---------|
| Elena                 | 131,442            | 181,968        | .148    |
| Father                | 393,818            | 181,968        | .593    |
| Kyriakos              | 297,398            | 181,968        | .025    |
| Mother                | 707,362            | 181,968        | .002    |
| NoteA                 | 647,105            | 192,757        | .112    |
| Silence1              | 324,049            | 192,757        | .466    |
| Silence2              | 176,847            | 192,757        | .022    |
| Silence3              | 480,281            | 192,757        | .135    |
| Song                  | 284,243            | 192,757        | .075    |

687

688

689 Figure 5. Combination of effects across different conditions and facilitators

690

691

692 More specifically, we realized that mostly during the ‘NoteA’ condition (as also  
693 observed in most of the other conditions), there was a significant increase in Delta  
694 Spectral Power for the ‘mother’ facilitator, while surprisingly, the ‘Song’ condition

695 showcased the highest impact particularly for the ‘father’ facilitator. As far as the  
696 ‘female music therapist (Elena)’ facilitator is concerned, the most stable and lowest  
697 Delta Spectral Power across all conditions was observed, indicating a consistent  
698 but minimal impact, while the ‘male music therapist (Kyriakos)’ facilitator showed  
699 moderate variability with minor peaks during the ‘NoteA’ and ‘Song’ conditions.  
700 Please note here, that especially for the ‘Song’ condition, the ‘male music therapist  
701 (Kyriakos)’ facilitator ranked second in impact after the ‘father’ facilitator. To further  
702 clarify these specific differences, post-hoc comparisons using the Least Significant  
703 Difference (LSD) test were conducted as previously decided, revealing that Delta  
704 brain activity was significantly higher with the 'Mother' facilitator compared to  
705 'Elena' ( $M = 575.92$ ,  $p = 0.002$ ), 'Kyriakos' ( $M = 409.96$ ,  $p = 0.025$ ), and 'Father' ( $M$   
706  $= 313.55$ ,  $p = 0.085$ ) – although for this latter coming quite close to being  
707 significant. Additionally, the 'NoteA' condition elicited significantly higher brain  
708 activity than the 'Silence2' condition ( $M = 470.26$ ,  $p = 0.022$ ) and showed close  
709 trends towards significance when compared to the 'Silence1' ( $M = 323.06$ ,  $p =$   
710  $0.112$ ) and 'Song' conditions ( $M = 362.86$ ,  $p = 0.075$ ).

711 Finally, as already mentioned, in addition to the analysis of Delta spectral power,  
712 we also explored the spectral entropy within the Delta frequency band to assess  
713 the complexity and predictability of the EEG signals under different facilitators and  
714 conditions. The mixed-effects model analysis for spectral entropy revealed once  
715 more a significant effect of the ‘facilitator’ parameter on entropy values [ $F(3, 88) =$   
716  $2.744$ ,  $p = 0.048$ ], while the spectral entropy across the ‘conditions’ parameter did  
717 not exhibit a significant overall effect [ $F(4, 88) = 0.380$ ,  $p = 0.822$ ]. Especially for

718 the former result, underscoring that the facilitator's role notably influences the  
719 variability and regularity of the EEG signals, we realized that, specifically, the  
720 'father' facilitator was associated with the highest mean entropy ( $M = 0.684$ ,  $SE =$   
721  $0.133$ ), while the 'mother' facilitator showed the lowest mean entropy ( $M = 0.558$ ,  
722  $SE = 0.133$ ) (please see also [figure 6](#)); although pairwise comparisons did not  
723 reach statistical significance (in all cases except the close to significance trend of  
724 the 'father' vs 'mother' comparison) after Bonferroni correction (please see [table](#)  
725 [4](#)).

726 Table 4. Pair-wise comparison of the 'facilitator' condition after Bonferroni  
727 correction

| Comparison          | Mean Difference | Standard Error (SE) | p-value |
|---------------------|-----------------|---------------------|---------|
| Elena vs. Father    | -0.02           | 0.049               | 1       |
| Elena vs. Kyriakos  | 0.063           | 0.049               | 1       |
| Elena vs. Mother    | 0.106           | 0.049               | 0.207   |
| Father vs. Kyriakos | 0.083           | 0.049               | 0.589   |
| Father vs. Mother   | 0.126           | 0.049               | 0.075   |
| Kyriakos vs. Mother | 0.043           | 0.049               | 1       |

728

729

730 Figure 6. Mean spectral entropy within the Delta band, showing a significant  
731 effect of the 'facilitator'. The 'father' shows the highest mean entropy and the  
732 'mother' the lowest.

733

734

## 735 **Discussion**

736 Although there is emerging evidence that musical interventions can positively  
737 influence the neurodevelopment of premature infants, existing studies often suffer  
738 from limited control over confounding variables, and a lack of rigorous  
739 neuroimaging-based evidence to support the precise neural mechanisms  
740 underlying these effects. Against this backdrop, the aim of the present study is to  
741 fill these gaps by providing robust, RCT-based data on the effects of a structured  
742 singing intervention, specifically focusing on the fundamental frequency (F0) of the  
743 voice and kinship of the music facilitators parameters, on the brain activity of  
744 premature infants in a Neonatal Intensive Care Unit (NICU) setting. Building upon  
745 this foundation, some of the key strengths of the protocol presented here include:  
746 (1) the use of an RCT design with an adequately powered sample size to detect  
747 statistically significant differences in electroencephalographic (EEG) activity  
748 across different conditions and facilitators; (2) the employment of an advanced  
749 neuroimaging technique to precisely monitor and study neural correlates of the  
750 intervention; and (3) the consideration of a variety of caregivers – in terms of  
751 kinship and voice register – to deeper explore the specific impact of singing on  
752 premature infant brain development.

753 More specifically, we must emphasize, first of all, that this study protocol was  
754 meticulously designed as a randomized controlled trial (RCT) – including,

755 therefore, both an experimental and a control group in its design – in order to  
756 provide a solid foundation for causal inferences regarding the effects of musical  
757 interventions on the brain activity of premature infants, allowing for a more  
758 nuanced understanding of any embedded confounders. Although our work does  
759 not yet report on the statistical comparisons between these groups, we believe that  
760 the approach we take is crucial for discerning any differences in the measurement  
761 process and the application of the specific stimuli, yielding more profound insights  
762 into the efficacy of the intervention. Moreover, with the integration of neuroimaging  
763 and more specifically the custom-made and adapted EEG (pre)processing pipeline  
764 utilized, the effects of our musical intervention on premature infants can be better  
765 studied and analyzed in more detail, thus playing a pivotal role in understanding  
766 the fine nuances of implementing the tools employed in the specific context. As  
767 discussed in previous work (Papatzikis, 2024), neuroimaging-guided interventions  
768 should be more extensively introduced in the NICU because they can provide real-  
769 time insights into the brain’s response to external stimuli, capturing in essence  
770 dynamic changes that might not be observable through behavioral measures  
771 alone. In this regard, our protocol approach not only enhances the precision of our  
772 study but can also contribute to the development of more tailored applications of  
773 this sort in the near future, optimizing other similar music-based interventions to  
774 suit the unique neurodevelopmental needs of each infant in the NICU.

775 Finally, it is important to point out that the study design we decided to implement  
776 includes the chosen variety of caregivers to allow us to provide a more  
777 comprehensive insight into the role of emotional and social factors evident and

778 embedded in the treatment process of premature infants in real-word situations  
779 and environments. For that matter, on the one hand, the inclusion of both parents  
780 in the protocol ensures that the study captures potential sex-specific effects, which  
781 could be related to differences in voice register or emotional bonding, while, on the  
782 other hand, incorporating professional music therapists as facilitators offers a  
783 standardized comparison to the former set of caregivers, helping to differentiate  
784 the effects of kinship as well as musical and clinical expertise related to the  
785 implementation of music-based interventions in this sensitive context. This  
786 diversity in caregivers could not only enrich the study's findings but may also  
787 enhance the generalizability of its results, ultimately leading to more  
788 comprehensive recommendations for NICU music-based interventions.

789 However, despite the strengths of our study, certain challenges and limitations  
790 must also be acknowledged. First, the heterogeneity of the study population, which  
791 may potentially include infants with varying degrees of prematurity – as defined by  
792 their gestational age – and differing health profiles, may introduce significant  
793 variability and complicate the interpretation of the results, as the infants' responses  
794 to the musical interventions may be influenced by factors beyond the scope of the  
795 study. For instance, the inclusion of participants with diverse medical histories,  
796 while increasing the generalizability of the findings, also necessitates careful  
797 consideration in data analysis and further clinical implementation to account for  
798 these differences. Furthermore, external factors, such as the NICU environment,  
799 could also influence the study's conduct and the quality of the data collected. The  
800 acoustic environment for once, despite being controlled within the study's

801 dedicated room, may still introduce variability that could affect the infants'  
802 responses, while the fragile emotional and psychological state of the parents, who  
803 are also facilitators in the study, could impact the delivery and reception of the  
804 musical intervention. These factors, although managed to the greatest extent  
805 possible, remain potential sources of variability that could influence the outcomes.

806 Despite these challenges, the potential impact of this study remains highly  
807 significant. Its findings, for once, could be easily integrated into existing neonatal  
808 care practices, offering healthcare providers a scientifically grounded method for  
809 enhancing the care of premature infants. Furthermore, the broader impact of this  
810 study could be substantial as the insights gained from the differential effects of  
811 maternal, paternal, and therapist-facilitated singing on neonatal brain activity could  
812 inform wider public health strategies aimed at improving neurodevelopmental  
813 outcomes for premature infants. Finally, this research may also encourage the  
814 expansion of music-based interventions in neonatal care units worldwide,  
815 particularly in regions where such practices are not yet widely implemented.

## 816 **Conclusion**

817 As this study is still in progress, it is essential to recognize that the findings  
818 presented here are preliminary, based on an initial analysis cohort. Therefore, the  
819 continuation and completion of the study will be critical for validating these early  
820 results and for providing a more comprehensive understanding of the effects of the  
821 specific music-based intervention on neonatal brain development. That said,  
822 several areas for further investigation have emerged from the process of

823 structuring, fine-tuning, and implementing our study protocol, suggesting for future  
824 research to explore the long-term effects of this and other similar interventions,  
825 particularly in terms of cognitive and behavioral outcomes as the infants develop.  
826 Additionally, more research is needed to understand the specific mechanisms  
827 through which other dynamic soundscapes and modes of musical delivery may  
828 influence the infants' brain activity, leading to more targeted and effective  
829 interventions. For all the above, it is our hope that the detailed report of our study  
830 protocol and its preliminary results provided here, may help future researchers  
831 better accommodate their investigation needs and study hypotheses in the  
832 emerging field of music-based interventions in the NICU with the help of  
833 neuroimaging tools and particularly electroencephalography, leading to new  
834 horizons of applicable treatment in this very sensitive yet crucial environment for  
835 human development.



## 836 **References**

- 837 Akerlund, L., & Gramming, P. (1994). Average loudness level, mean fundamental  
838 frequency, and subglottal pressure: Comparison between female singers and  
839 nonsingers. *Journal of Voice*, 8(3), 263-270.
- 840 Akiyama, A., Tsai, J. D., WY, T. E., Kamino, D., Hahn, C., Go, C. Y., ... & Ochi, A.  
841 (2021). The effect of music and white noise on electroencephalographic  
842 (EEG) functional connectivity in neonates in the neonatal intensive care unit.  
843 *Journal of Child Neurology*, 36(1), 38-47.
- 844 Alemdar, D. K., & Özdemir, F. K. (2017). Effects of covering the eyes versus playing  
845 intrauterine sounds on premature infants' pain and physiological parameters  
846 during venipuncture. *Journal of Pediatric Nursing*, 37, e30-e36.
- 847 Almadhoob, A., & Ohlsson, A. (2020). Sound reduction management in the neonatal  
848 intensive care unit for preterm or very low birth weight infants. *The Cochrane*  
849 *Database of Systematic Reviews*, 2020(1), CD010333.
- 850 Almadhoob, A., & Ohlsson, A. (2020). Sound reduction management in the neonatal  
851 intensive care unit for preterm or very low birth weight infants. *The Cochrane*  
852 *database of systematic reviews*, 1, CD010333.  
853 <https://doi.org/10.1002/14651858.CD010333.pub3>
- 854 Arnon, S., Shapsa, A., Forman, L., Regev, R., Bauer, S., Litmanovitz, I., & Dolfín, T.  
855 (2006). Live music is beneficial to preterm infants in the neonatal intensive  
856 care unit environment. *Birth*, 33(2), 131-136.
- 857 Bağlı, E., Küçükoğlu, S., & Soylu, H. (2024). The effect of lullabies and classical  
858 music on preterm neonates' cerebral oxygenation, vital signs, and comfort  
859 during orogastric tube feeding: A randomized controlled trial. *Biological*  
860 *Research For Nursing*, 26(2), 181-191.

- 861 Blackburn S. (1998). Environmental impact of the NICU on developmental  
862 outcomes. *Journal of pediatric nursing*, 13(5), 279–289.  
863 [https://doi.org/10.1016/S0882-5963\(98\)80013-4](https://doi.org/10.1016/S0882-5963(98)80013-4)
- 864 Bonkowsky, J. L., deVeber, G., Kosofsky, B. E., & Child Neurology Society  
865 Research Committee (2020). Pediatric Neurology Research in the Twenty-  
866 First Century: Status, Challenges, and Future Directions Post-COVID-19.  
867 *Pediatric neurology*, 113, 2–12.  
868 <https://doi.org/10.1016/j.pediatrneurol.2020.08.012>
- 869 Borghini, A., Pierrehumbert, B., Miljkovitch, R., Muller-Nix, C., Forcada-Guex, M., &  
870 Ansermet, F. (2006). Mother’s attachment representations of their premature  
871 infant at 6 and 18 months after birth. *Infant Mental Health Journal: Official*  
872 *Publication of The World Association for Infant Mental Health*, 27(5), 494-  
873 508.
- 874 Bourel-Ponchel, E., Gueden, S., Hasaerts, D., Héberlé, C., Malfilâtre, G., Mony, L.,  
875 ... & Lamblin, M. D. (2021). Normal EEG during the neonatal period:  
876 maturational aspects from premature to full-term  
877 newborns. *Neurophysiologie Clinique*, 51(1), 61-88.
- 878 Bozzette, M. (2007). A review of research on premature infant-mother interaction.  
879 *Newborn and Infant Nursing Reviews*, 7(1), 49-55.
- 880 Britton, J. W., Frey, L. C., Hopp, J. L., Korb, P., Koubeissi, M. Z., Lievens, W. E., ...  
881 & St Louis, E. K. (2016). *Electroencephalography (EEG): An introductory text*  
882 *and atlas of normal and abnormal findings in adults, children, and infants*.
- 883 Brown, G. (2009). NICU noise and the preterm infant. *Neonatal Network*, 28(3), 165-  
884 173.
- 885 Bueno, C., & Menna-Barreto, L. (2016). Development of sleep/wake, activity and  
886 temperature rhythms in newborns maintained in a neonatal intensive care

- 887 unit and the impact of feeding schedules. *Infant behavior & development*, 44,  
888 21-8 . <https://doi.org/10.1016/j.infbeh.2016.05.004>
- 889 Caine, J. (1991). The effects of music on the selected stress behaviors, weight,  
890 caloric and formula intake, and length of hospital stay of premature and low  
891 birth weight neonates in a newborn intensive care unit. *Journal of music*  
892 *therapy*, 28(4), 180-192.
- 893 Carroll, J., Taden, S., & Zeng, F. G. (2011). Fundamental frequency is critical to  
894 speech perception in noise in combined acoustic and electric hearing. *The*  
895 *Journal of the Acoustical Society of America*, 130(4), 2054–2062.  
896 <https://doi.org/10.1121/1.3631563>
- 897 Chung, E. H., Chou, J., & Brown, K. A. (2020). Neurodevelopmental outcomes of  
898 preterm infants: a recent literature review. *Translational pediatrics*, 9(Suppl  
899 1), S3.
- 900 Cirelli, L. K., Spinelli, C., Nozaradan, S., & Trainor, L. J. (2016). Measuring neural  
901 entrainment to beat and meter in infants: effects of music background.  
902 *Frontiers in neuroscience*, 10, 191178.
- 903 Coleman R. O. (1976). A comparison of the contributions of two voice quality  
904 characteristics to the perception of maleness and femaleness in the  
905 voice. *Journal of speech and hearing research*, 19(1), 168–180.  
906 <https://doi.org/10.1044/jshr.1901.168>
- 907 Cook, K. M., De Asis-Cruz, J., Kim, J. H., Basu, S. K., Andescavage, N., Murnick,  
908 J., ... & Limperopoulos, C. (2023). Experience of early-life pain in premature  
909 infants is associated with atypical cerebellar development and later  
910 neurodevelopmental deficits. *BMC medicine*, 21(1), 435.
- 911 Coppola, G., Cassibba, R., & Costantini, A. (2007). What makes fathers feel  
912 involved in caring for their preterm infants?. *Journal of Perinatal & Neonatal*  
913 *Nursing*, 21(3), 243-252.

- 914 Dimitropoulos K. (2025) *Title of the master's thesis*. Master's thesis, in preparation  
915 for submission, University of Macedonia, Thessaloniki, Greece [available  
916 upon request]
- 917 Dokkum, N., Fagan, L., Cullen, M., & Loewy, J. (2023). Assessing HeartSong as a  
918 Neonatal Music Therapy Intervention. *Advances in Neonatal Care*, 23, 264 -  
919 271. <https://doi.org/10.1097/ANC.0000000000001068>
- 920 EFCNI, Sizun, J., Hallberg, B., et al. (2018). European Standards of Care for  
921 Newborn Health: Management of the acoustic environment. European  
922 Foundation for the Care of Newborn Infants. Retrieved from [https://newborn-](https://newborn-health-standards.org)  
923 [health-standards.org](https://newborn-health-standards.org)
- 924 Fancourt, D., & Perkins, R. (2018). The effects of mother–infant singing on  
925 emotional closeness, affect, anxiety, and stress hormones. *Music & Science*,  
926 1. <https://doi.org/10.1177/2059204317745746>
- 927 Fant, G. (1966). A note on vocal tract size factors and non-uniform F-pattern  
928 scalings. *Speech Transmission Laboratory Quarterly Progress and Status*  
929 *Report*, 1, 22-30.
- 930 Field, T. (1995). Massage therapy for infants and children. *Journal of Developmental*  
931 *& Behavioral Pediatrics*, 16(2), 105-111.
- 932 Forcada-Guex, M., Pierrehumbert, B., Borghini, A., Moessinger, A., & Muller-Nix, C.  
933 (2006). Early dyadic patterns of mother–infant interactions and outcomes of  
934 prematurity at 18 months. *Pediatrics*, 118(1), e107-e114.
- 935 French, C., Pinnock, H., Forbes, G., Skene, I., & Taylor, S. J. (2020). Process  
936 evaluation within pragmatic randomised controlled trials: what is it, why is it  
937 done, and can we find it?—a systematic review. *Trials*, 21, 1-16.
- 938 Gao, R. (2016). Interpreting the electrophysiological power spectrum. *Journal of*  
939 *neurophysiology*, 115(2), 628-630.

- 940 Gebreheat, G., & Teame, H. (2022). Survival and mortality of preterm neonates in a  
941 neonatal intensive care unit in Northern Ethiopia: a retrospective cohort  
942 study. *Scientific reports*, 12(1), 600.
- 943 Gerhard, D. (2003). Pitch extraction and fundamental frequency: History and current  
944 techniques (pp. 0-22). Regina, SK, Canada: Department of Computer  
945 Science, University of Regina.
- 946 Gerhard, D. (2003). *Pitch extraction and fundamental frequency: History and current*  
947 *techniques* (pp. 0-22). Regina, Canada: Department of Computer Science,  
948 University of Regina.
- 949 Gerhard, D. (2003). Pitch extraction and fundamental frequency: History and current  
950 techniques (pp. 0-22). Regina, SK, Canada: Department of Computer  
951 Science, University of Regina.
- 952 Gerhardt, K. J., & Abrams, R. M. (2000). Fetal exposures to sound and vibroacoustic  
953 stimulation. *Journal of Perinatology*, 20(1), S21-S30.
- 954 Guidry-Jorgensen, S., Abroms, K. I., & Staffileno, B. A. (2011). The cognitive and  
955 emotional development of premature infants: A review of the literature.  
956 *Journal of Pediatric Nursing*, 26(3), 220-227.
- 957 Háden, G. P., Bouwer, F. L., Honing, H., & Winkler, I. (2024). Beat processing in  
958 newborn infants cannot be explained by statistical learning based on  
959 transition probabilities. *Cognition*, 243, 105670.
- 960 Haslbeck, F., & Bassler, D. (2020). Clinical Practice Protocol of Creative Music  
961 Therapy for Preterm Infants and Their Parents in the Neonatal Intensive Care  
962 Unit.. *Journal of visualized experiments : JoVE*, 155.  
963 <https://doi.org/10.3791/60412>.
- 964 Hirst, D., & De Looze, C. (2021). Fundamental frequency and pitch. In R.-A. Knight  
965 & J. Setter (Eds.), *The Cambridge handbook of phonetics* (pp. 336–361).  
966 Cambridge University Press. <https://doi.org/10.1017/9781108644198.014>

- 967 Hu, B. H., Guo, W., Wang, P. Y., Henderson, D., & Jiang, S. C. (2000). Intense  
968 noise-induced apoptosis in hair cells of guinea pig cochleae. *Acta oto-*  
969 *laryngologica*, 120(1), 19-24.
- 970 Iyendo, T. O. (2017). Sound as a supportive design intervention for improving health  
971 care experience in the clinical ecosystem: A qualitative study.  
972 *Complementary therapies in clinical practice*, 29, 58-96.
- 973 Kamio, T., Watanabe, K. I., & Okubo, K. (2012). Acoustic stimulation promotes DNA  
974 fragmentation in the Guinea pig cochlea. *Journal of Nippon Medical School*,  
975 79(5), 349-356.
- 976 Kapucu, F. E., Väilki, I., Mikkonen, J. E., Leone, C., Lenk, K., Tanskanen, J. M., &  
977 Hyttinen, J. A. (2016). Spectral entropy based neuronal network  
978 synchronization analysis based on microelectrode array  
979 measurements. *Frontiers in Computational Neuroscience*, 10, 112.
- 980 Kobus, S., Diezel, M., Dewan, M. V., Huening, B., Dathe, A. K., Felderhoff-Mueser,  
981 U., & Bruns, N. (2021). Music Therapy Is Effective during Sleep in Preterm  
982 Infants. *International journal of environmental research and public health*,  
983 18(16), 8245. <https://doi.org/10.3390/ijerph18168245>
- 984 Kuo, D., McAllister, J., Rossignol, L., Turchi, R., & Stille, C. (2018). Care  
985 Coordination for Children With Medical Complexity: Whose Care Is It,  
986 Anyway?. *Pediatrics*, 141, S224 - S232. [https://doi.org/10.1542/peds.2017-  
987 1284G](https://doi.org/10.1542/peds.2017-1284G)
- 988 Kvaratskhelia, N., Rurua, N., & Vadachkoria, S. G. (2023). Biomedical and  
989 Psychosocial Determinants of Early Neurodevelopment After Preterm Birth.  
990 *Global Pediatric Health*, 10, 2333794X231160366.
- 991 Latinus, M., & Taylor, M. J. (2012). Discriminating male and female voices:  
992 differentiating pitch and gender. *Brain topography*, 25, 194-204.

- 993 Lense, M. D., Shultz, S., Astésano, C., & Jones, W. (2022). Music of infant-directed  
994 singing entrains infants' social visual behavior. *Proceedings of the National*  
995 *Academy of Sciences of the United States of America*, 119(45),  
996 e2116967119. <https://doi.org/10.1073/pnas.2116967119>
- 997 Liu, Z., Zhang, Y., Liu, Y., & Li, L. (2023). The role and outcomes of music therapy  
998 during pregnancy: A systematic review of randomized controlled trials.  
999 *Journal of Obstetrics and Gynecology Research*, 49(6), 1035-1048.  
1000 <https://doi.org/10.1111/jog.15055>
- 1001 Loewy, J., Stewart, K., Dassler, A. M., Telsey, A., & Homel, P. (2013). The effects  
1002 of music therapy on vital signs, feeding, and sleep in premature infants.  
1003 *Pediatrics*, 131(5), 902-918.
- 1004 Mai, X., Xu, L., Li, M., Shao, J., Zhao, Z., deRegnier, R. A., Nelson, C. A., & Lozoff,  
1005 B. (2012). Auditory recognition memory in 2-month-old infants as assessed  
1006 by event-related potentials. *Developmental neuropsychology*, 37(5), 400–  
1007 414. <https://doi.org/10.1080/87565641.2011.650807>
- 1008 Mills, M., & Melhuish, E. (1974). Recognition of mother's voice in early  
1009 infancy. *Nature*, 252(5479), 123-124.
- 1010 Muller-Nix, C., Forcada-Guex, M., Pierrehumbert, B., Jaunin, L., Borghini, A., &  
1011 Ansermet, F. (2004). Prematurity, maternal stress and mother–child  
1012 interactions. *Early Human Development*, 79(2), 145-158.
- 1013 Newnham, C. A., Milgrom, J., & Skouteris, H. (2009). Effectiveness of a modified  
1014 mother–infant transaction program on outcomes for preterm infants from 3 to  
1015 24 months of age. *Infant behavior & development*, 32(1), 17-26.
- 1016 O'Toole, J. M., & Boylan, G. B. (2017). NEURAL: quantitative features for newborn  
1017 EEG using Matlab. arXiv preprint arXiv:1704.05694.



- 1018 Papatzikis, E. (2024) Neuroimaging-Guided Music Interventions for Infants in the  
1019 NICU, *JAMA Pediatrics*, 178(9): 853-854  
1020 <https://doi.org/10.1001/jamapediatrics.2024.1886>
- 1021 Papatzikis, E., Agapaki, M., Naveena Selvan, R., Hanson-Abromeit, D., Gold, C.,  
1022 Epstein, S., ... & Pandey, V. (2024a). Music Medicine and Music Therapy in  
1023 Pediatric Care: A systematic review of passive music listening research  
1024 applications and findings on infant development and medical practice.  
1025 medRxiv, 2024-04.
- 1026 Papatzikis, E., Agapaki, M., Selvan, R., Pandey, V. & Zeba, F. (2023) Quality standards  
1027 and recommendations for research in music and neuroplasticity. *Annals of the New*  
1028 *York Academy of Sciences* 00, 1-14. doi: <https://doi.org/10.1111/nyas.14944>
- 1029 Papatzikis, E., Dimitropoulos, K., Gerdes, A., Tataropoulou, K., Pasoudi, E.,  
1030 Kyrtsoudi, M., & Nika, A. (2024d). Advancing EEG processing and analysis  
1031 in neonatal music interventions: Introducing a specialized qEEG pipeline for  
1032 premature infants in NICU. *Proceedings of the FIT'NG 2024 Conference*,  
1033 Baltimore, MD, USA, Sept 25-26, 2024.
- 1034 Papatzikis, E., Dimitropoulos, K., Gerdes, A., Tataropoulou, K., Pasoudi, E.,  
1035 Kyrtsoudi, M., & Nika, A. (2024b). Advancing EEG processing and analysis  
1036 in neonatal music interventions: Introducing a specialized qEEG pipeline for  
1037 premature infants in NICU. [Research poster]. School of Music Collage  
1038 Concert, University of Kansas, Lied Center, Lawrence, KS, United States.
- 1039 Papatzikis, E., Dimitropoulos, K., Tataropoulou, K., Kyrtsoudi, M., & Nika, A.  
1040 (2024c). Advancing EEG processing and analysis in neonatal music  
1041 interventions: Introducing a specialized qEEG pipeline for premature infants  
1042 in the NICU. *Music & Medicine*, 16(3), 194.
- 1043 Pavlidis, E., Lloyd, R. O., Livingstone, V., O'Toole, J. M., Filan, P. M., Pisani, F., &  
1044 Boylan, G. B. (2020). A standardised assessment scheme for conventional  
1045 EEG in preterm infants. *Clinical Neurophysiology*, 131(1), 199-204.



- 1046 Pavlidis, E., Lloyd, R. O., Mathieson, S., & Boylan, G. B. (2017). A review of  
1047 important electroencephalogram features for the assessment of brain  
1048 maturation in premature infants. *Acta paediatrica*, 106(9), 1394-1408.
- 1049 Perani, D., Saccuman, M. C., Scifo, P., Spada, D., Andreolli, G., Rovelli, R., ... &  
1050 Koelsch, S. (2010). Functional specializations for music processing in the  
1051 human newborn brain. *Proceedings of the National Academy of Sciences*,  
1052 107(10), 4758-4763.
- 1053 Plack, C. J. (2005). Auditory perception. *Handbook of cognition*, 7198.
- 1054 Pölkki, T., & Korhonen, A. (2012). The effectiveness of music on pain among  
1055 preterm infants in the neonatal intensive care unit: a systematic review. *JBI*  
1056 *Evidence Synthesis*, 10(58), 4600-4609.
- 1057 Praskach, A. (2009). Nature, daylight and sound: A sensible environment for the  
1058 families, staff, and patients of neonatal intensive care units (Master's thesis).  
1059 University of South Florida. Available at  
1060 <https://scholarcommons.usf.edu/etd/2154>
- 1061 Qattea, I., Farghaly, M. A. A., Kattea, M. O., Abdula, N., Mohamed, M. A., & Aly, H.  
1062 (2022). Survival of infants born at periviable gestation: The US national  
1063 database. *Lancet regional health. Americas*, 14, 100330.  
1064 <https://doi.org/10.1016/j.lana.2022.100330>
- 1065 Ren, H., Zou, L., Wang, L., Lu, C., Yuan, Y., Dai, C., & Chen, W. (2021). Evaluation  
1066 of the short-term music therapy on brain functions of preterm infants using  
1067 functional near-infrared spectroscopy. *Frontiers in neurology*, 12, 649340.
- 1068 Reuter, C., Bartha-Doering, L., Czedik-Eysenberg, I., Maeder, M., Bertsch, M. A.,  
1069 Bibl, K., ... & Giordano, V. (2023). Living in a box: Understanding acoustic  
1070 parameters in the NICU environment. *Frontiers in Pediatrics*, 11, 1147226.
- 1071 Robertson, S. (2023). Scale in Acoustic Modelling (Doctoral dissertation, University  
1072 of Toronto (Canada)).

- 1073 Santos, J., Pearce, S. E., & Stroustrup, A. (2015). Impact of hospital-based  
1074 environmental exposures on neurodevelopmental outcomes of preterm  
1075 infants. *Current opinion in pediatrics*, 27(2), 254–260.  
1076 <https://doi.org/10.1097/MOP.000000000000190>
- 1077 Shoemark, H., Hanson-Abromeit, D., & Stewart, L. (2015). Constructing optimal  
1078 experience for the hospitalized newborn through neuro-based music therapy.  
1079 *Frontiers in human neuroscience*, 9, 487.
- 1080 Spence, M. J., & Freeman, M. S. (1996). Newborn infants prefer the maternal low-  
1081 pass filtered voice, but not the maternal whispered voice. *Infant Behavior and*  
1082 *Development*, 19(2), 199-212.
- 1083 Titze I. R. (1989). Physiologic and acoustic differences between male and female  
1084 voices. *The Journal of the Acoustical Society of America*, 85(4), 1699–1707.  
1085 <https://doi.org/10.1121/1.397959>
- 1086 Trehub, S. E. (1987). Infants' perception of musical patterns. *Perception &*  
1087 *Psychophysics*, 41(6), 635-641.
- 1088 Treyvaud, K., Doyle, L. W., Lee, K. J., Roberts, G., Lim, J., Inder, T. E., & Anderson,  
1089 P. J. (2012). Social–emotional difficulties in very preterm and term 2-year-  
1090 olds predict specific social–emotional problems at the age of 5 years. *Journal*  
1091 *of pediatric psychology*, 37(7), 779-785.
- 1092 van't Westende, C., Geraedts, V. J., Van Ramesdonk, T., Dudink, J., Schoonmade,  
1093 L. J., Van der Knaap, M. S., ... & Van de Pol, L. A. (2022). Neonatal  
1094 quantitative electroencephalography and long-term outcomes: a systematic  
1095 review. *Developmental Medicine & Child Neurology*, 64(4), 413-420.
- 1096 Vicencio, L. A., Ananthanarayana, R. M., Khudr, J., & Monson, B. B. (2023). Daily  
1097 sound level exposure for preterm infants in the neonatal intensive care unit.  
1098 *The Journal of the Acoustical Society of America*, 153(3\_supplement), A160-  
1099 A160.

- 1100 Vrticka, P., & Vuilleumier, P. (2012). Neuroscience of human social interactions and  
1101 adult attachment style. *Frontiers in human neuroscience*, 6, 212.
- 1102 Wallois, F., Routier, L., Heberlé, C., Mahmoudzadeh, M., Bourel-Ponchel, E., &  
1103 Moghimi, S. (2021). Back to basics: the neuronal substrates and mechanisms  
1104 that underlie the electroencephalogram in premature  
1105 neonates. *Neurophysiologie Clinique*, 51(1), 5-33.
- 1106 White, R. D., Smith, J. A., Shepley, M. M., et al. (2013). Recommended standards  
1107 for newborn ICU design, eighth edition. *Journal of Perinatology*, 33(Suppl 1),  
1108 S2–S16. <https://doi.org/10.1038/jp.2013.10>
- 1109 World Health Organization. (2022). Preterm birth. Retrieved from  
1110 <https://www.who.int/news-room/fact-sheets/detail/preterm-birth>
- 1111 Yakobson, D., Gold, C., Beck, B. D., Elefant, C., Bauer-Rusek, S., & Arnon, S.  
1112 (2021). Effects of Live Music Therapy on Autonomic Stability in Preterm  
1113 Infants: A Cluster-Randomized Controlled Trial. *Children* (Basel,  
1114 Switzerland), 8(11), 1077. <https://doi.org/10.3390/children8111077>
- 1115 Zhang, S., & He, C. (2023). Effect of the sound of the mother’s heartbeat combined  
1116 with white noise on heart rate, weight, and sleep in premature infants: a  
1117 retrospective comparative cohort study. *Annals of Palliative Medicine*, 12(1),  
1118 11120-11120.
- 1119

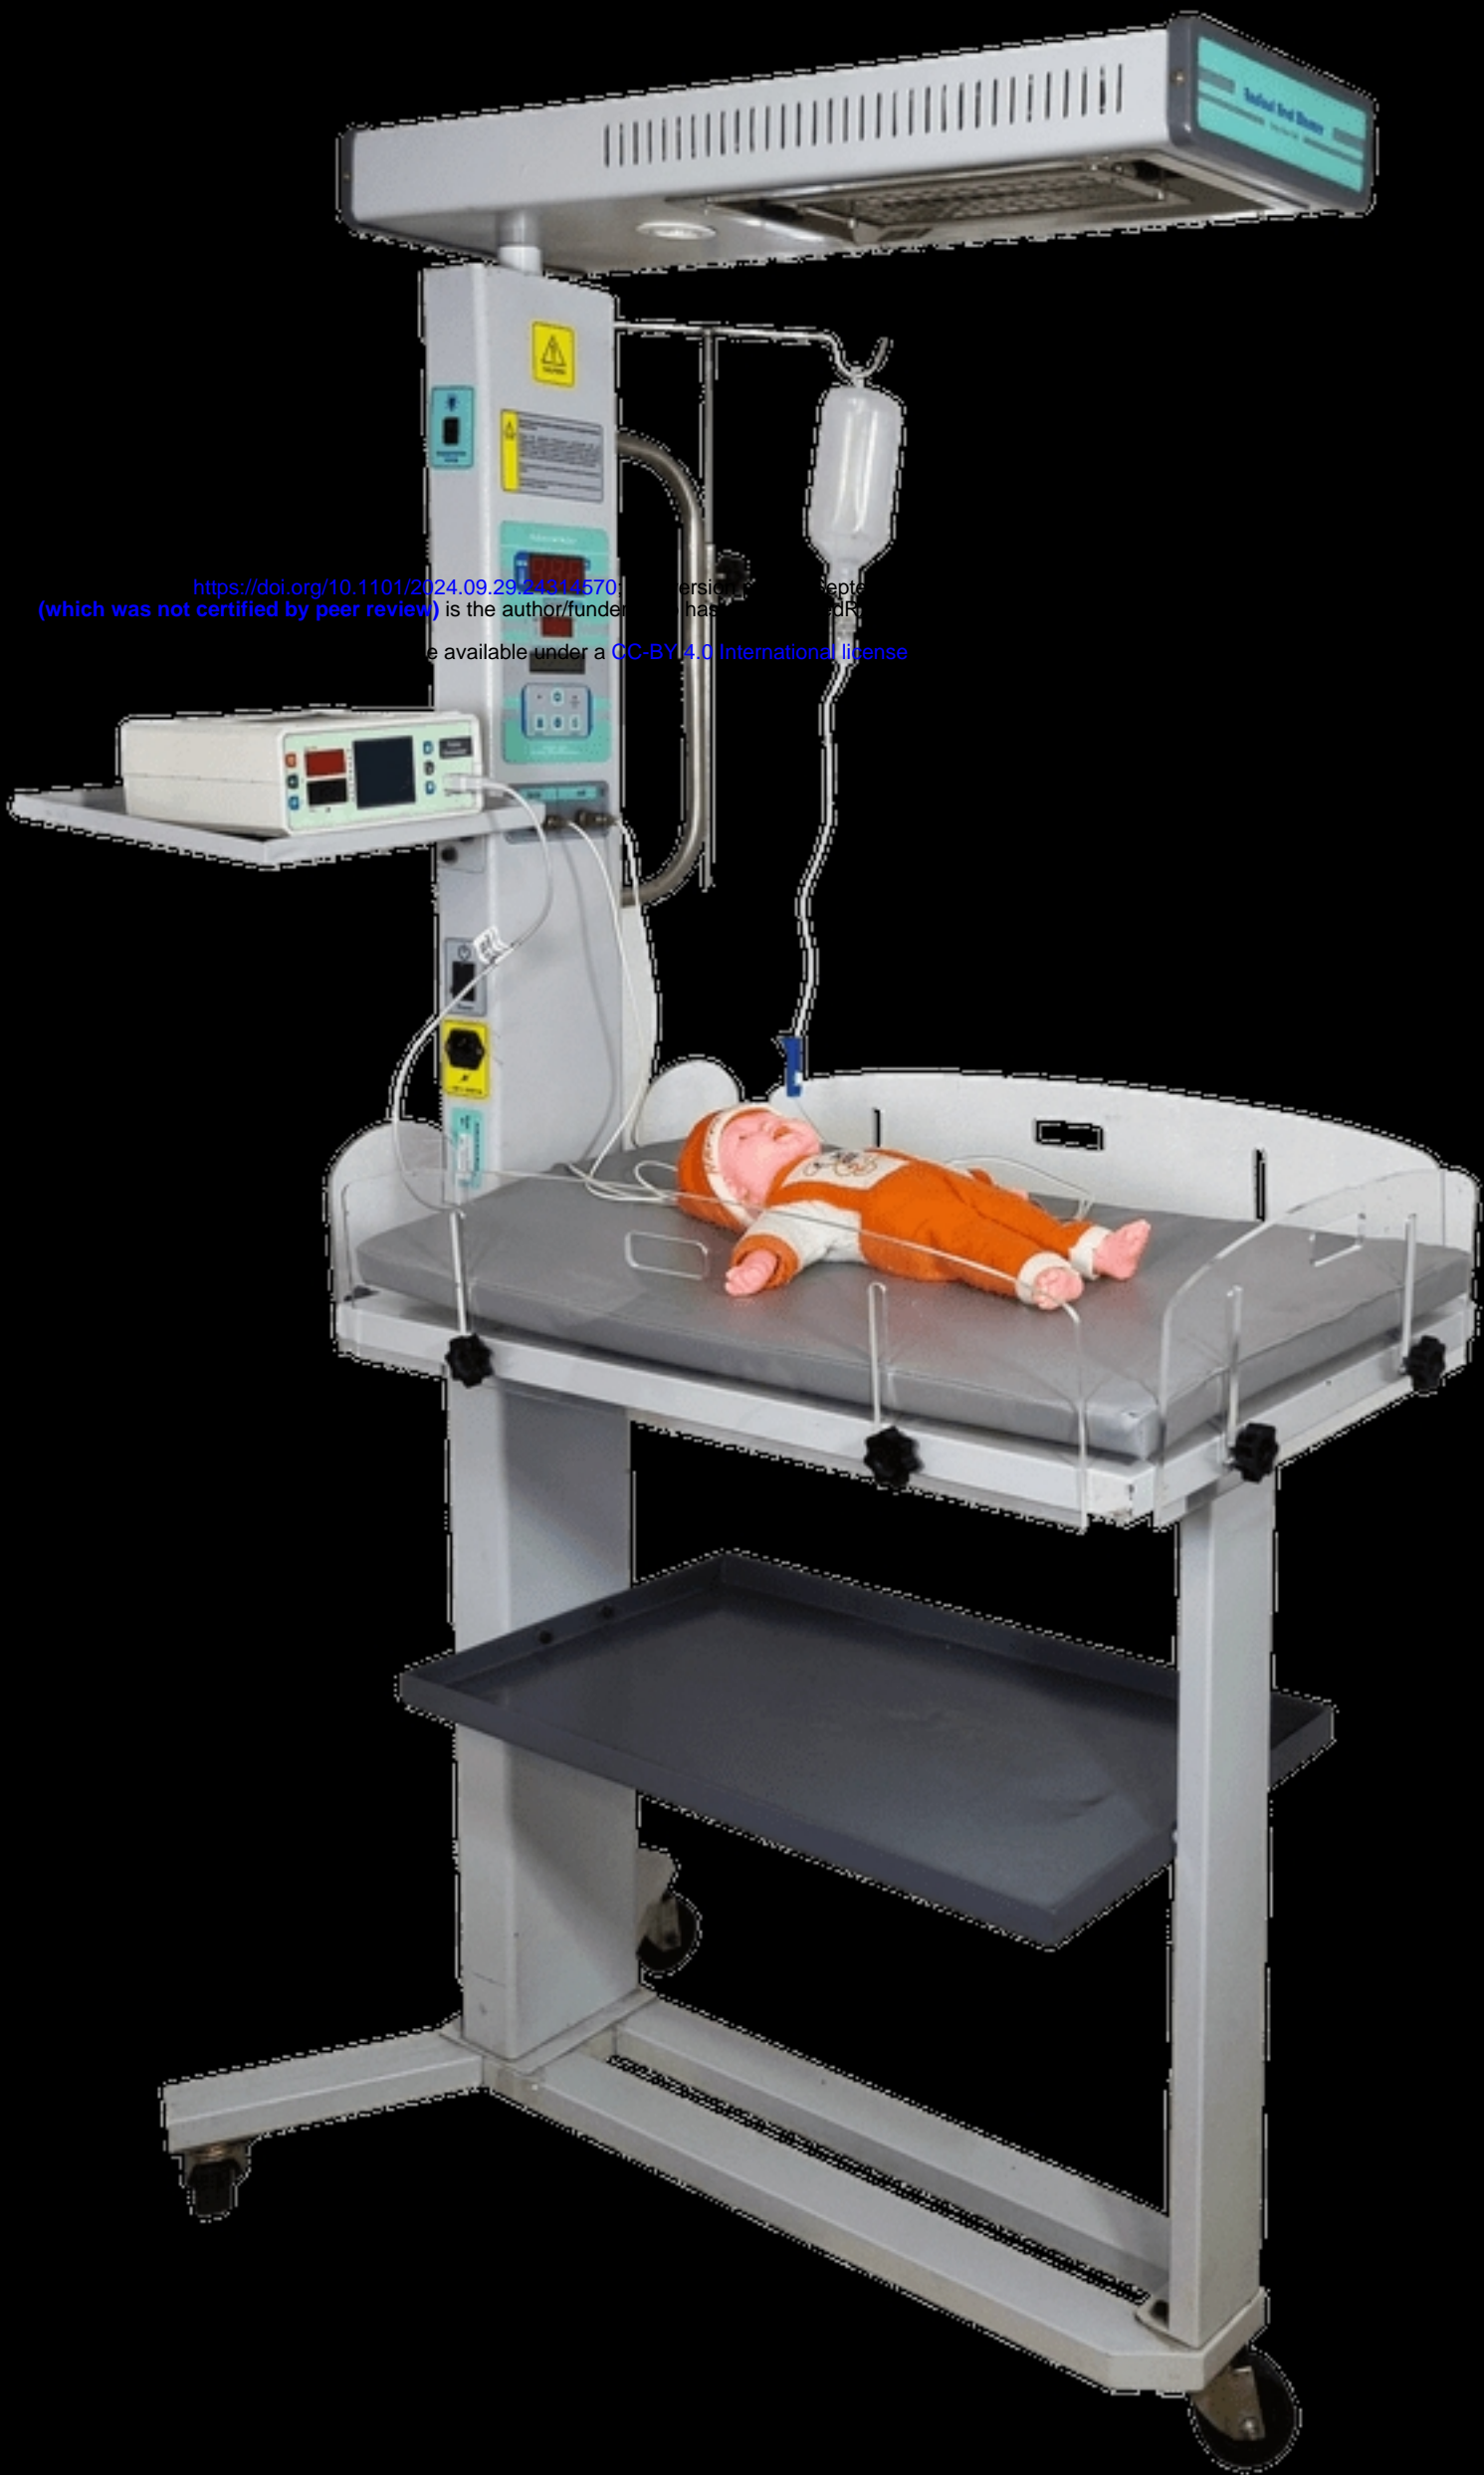

<https://doi.org/10.1101/2024.09.29.24314570> is the author/funder, who has granted medRxiv a license to display the preprint in perpetuity. It is made available under a [CC-BY 4.0 International license](https://creativecommons.org/licenses/by/4.0/).

Figure 3

Q-Q Plot of Residuals (Reference: Elena & Silence 1)

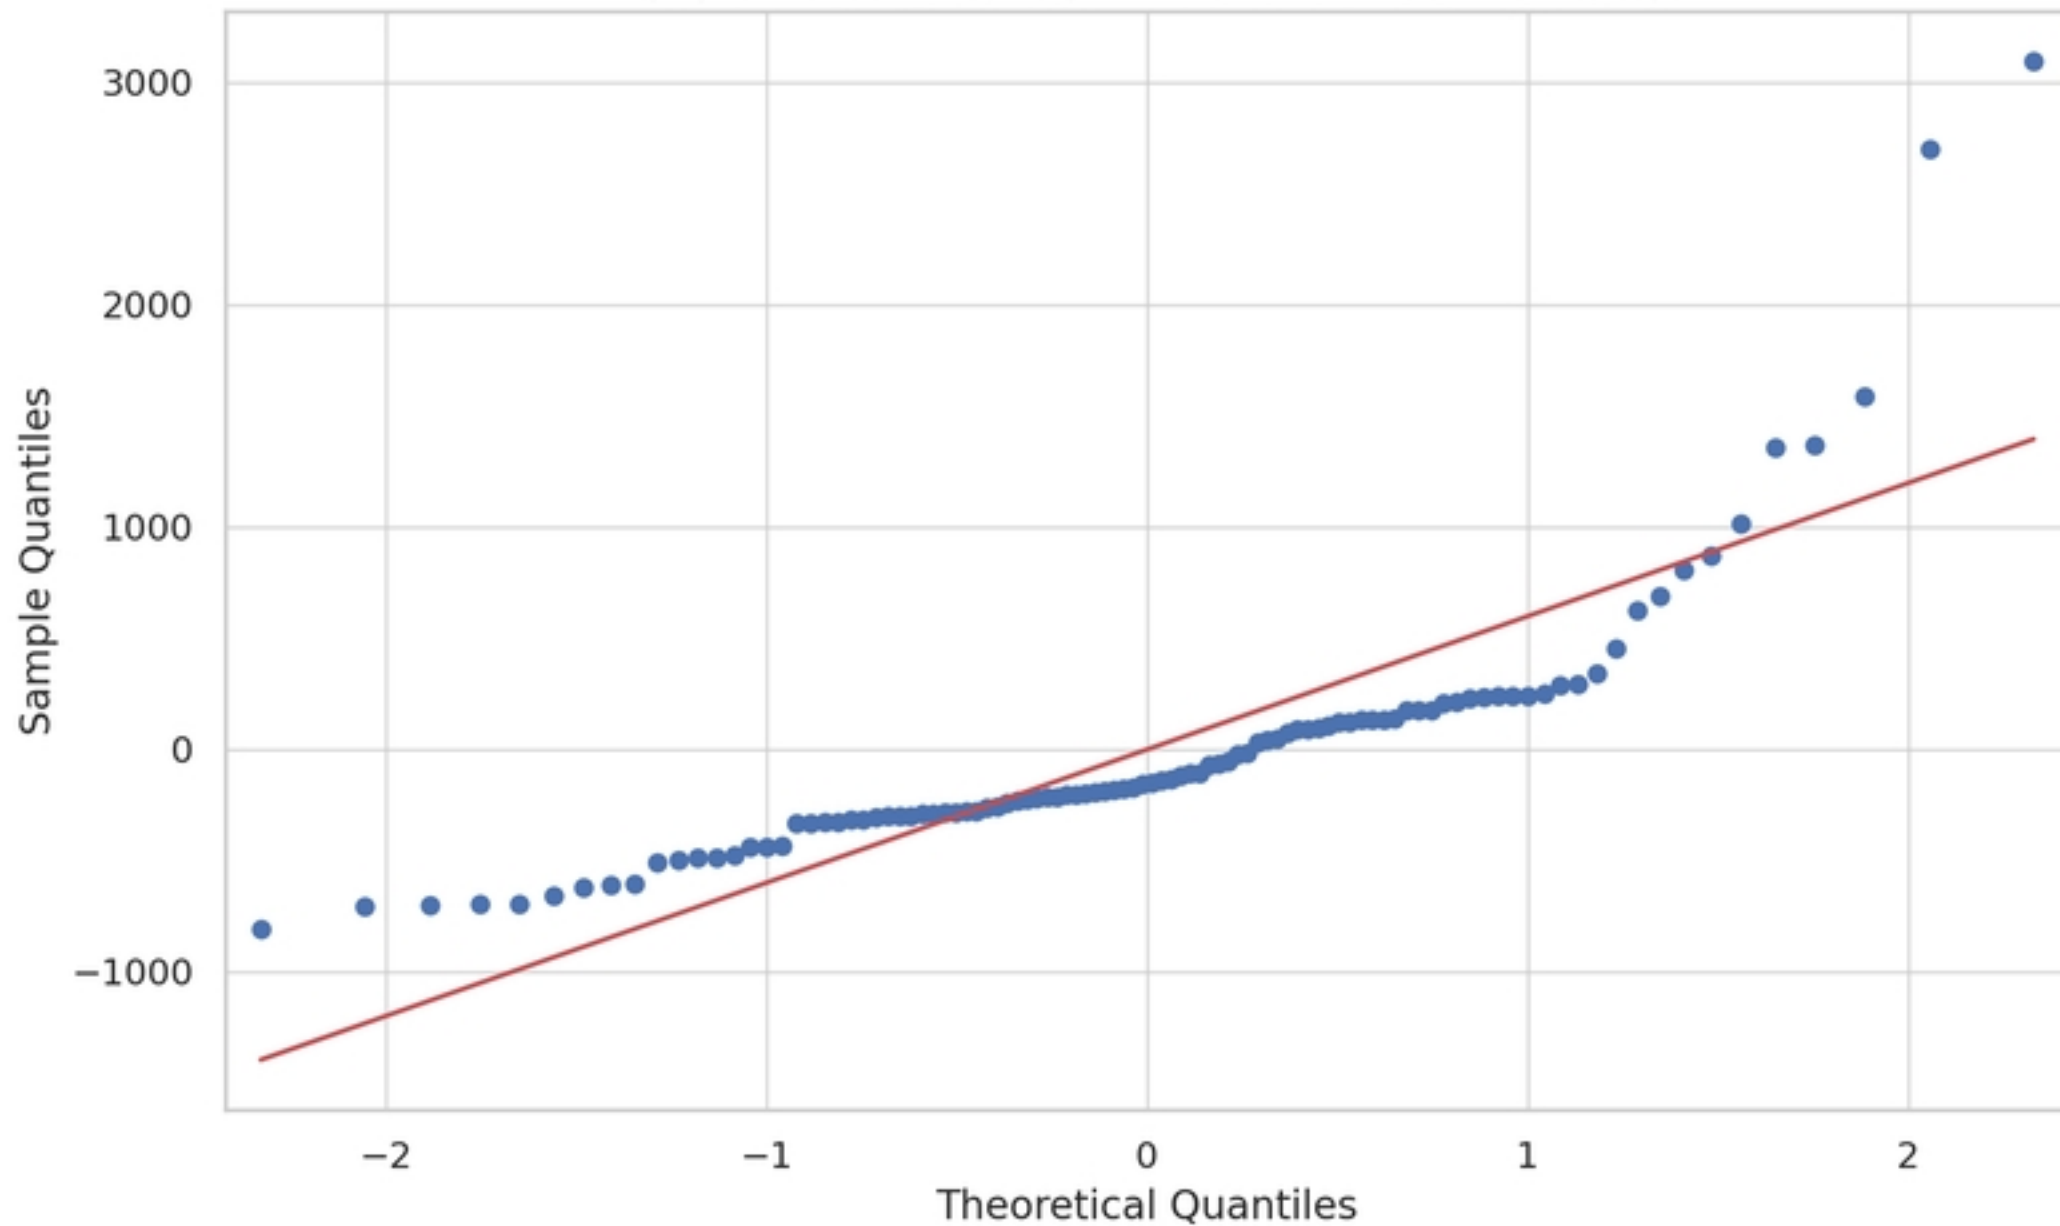

Figure 4

Interaction Plot of Delta Spectral Power by Condition and Facilitator

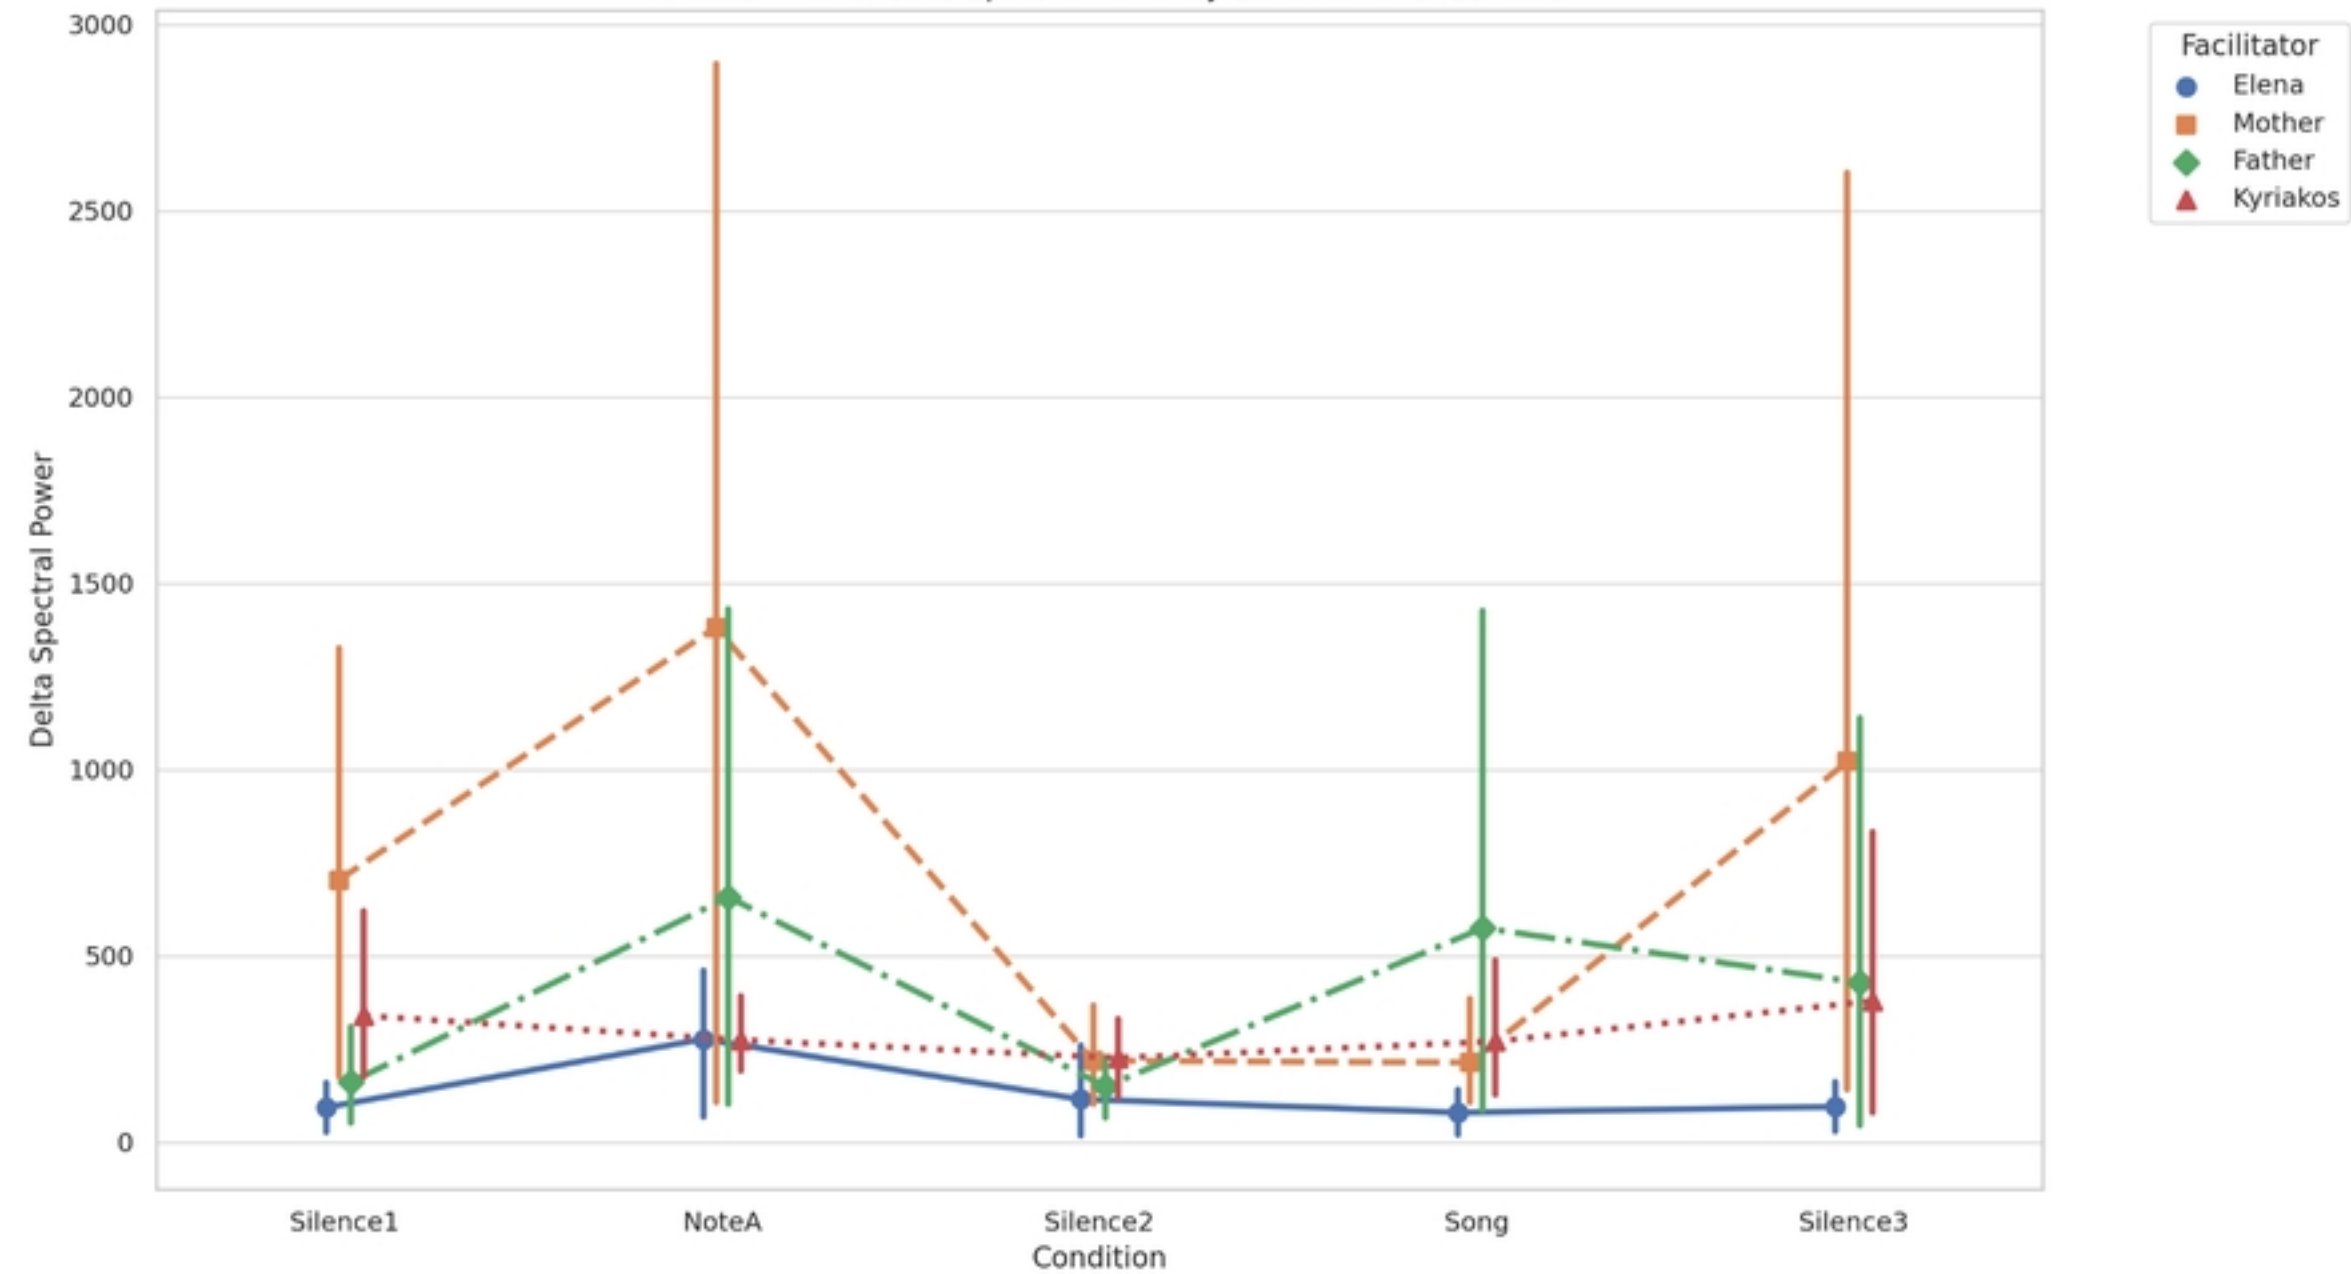

Figure 5



Mean Spectral Entropy by Facilitator and Condition

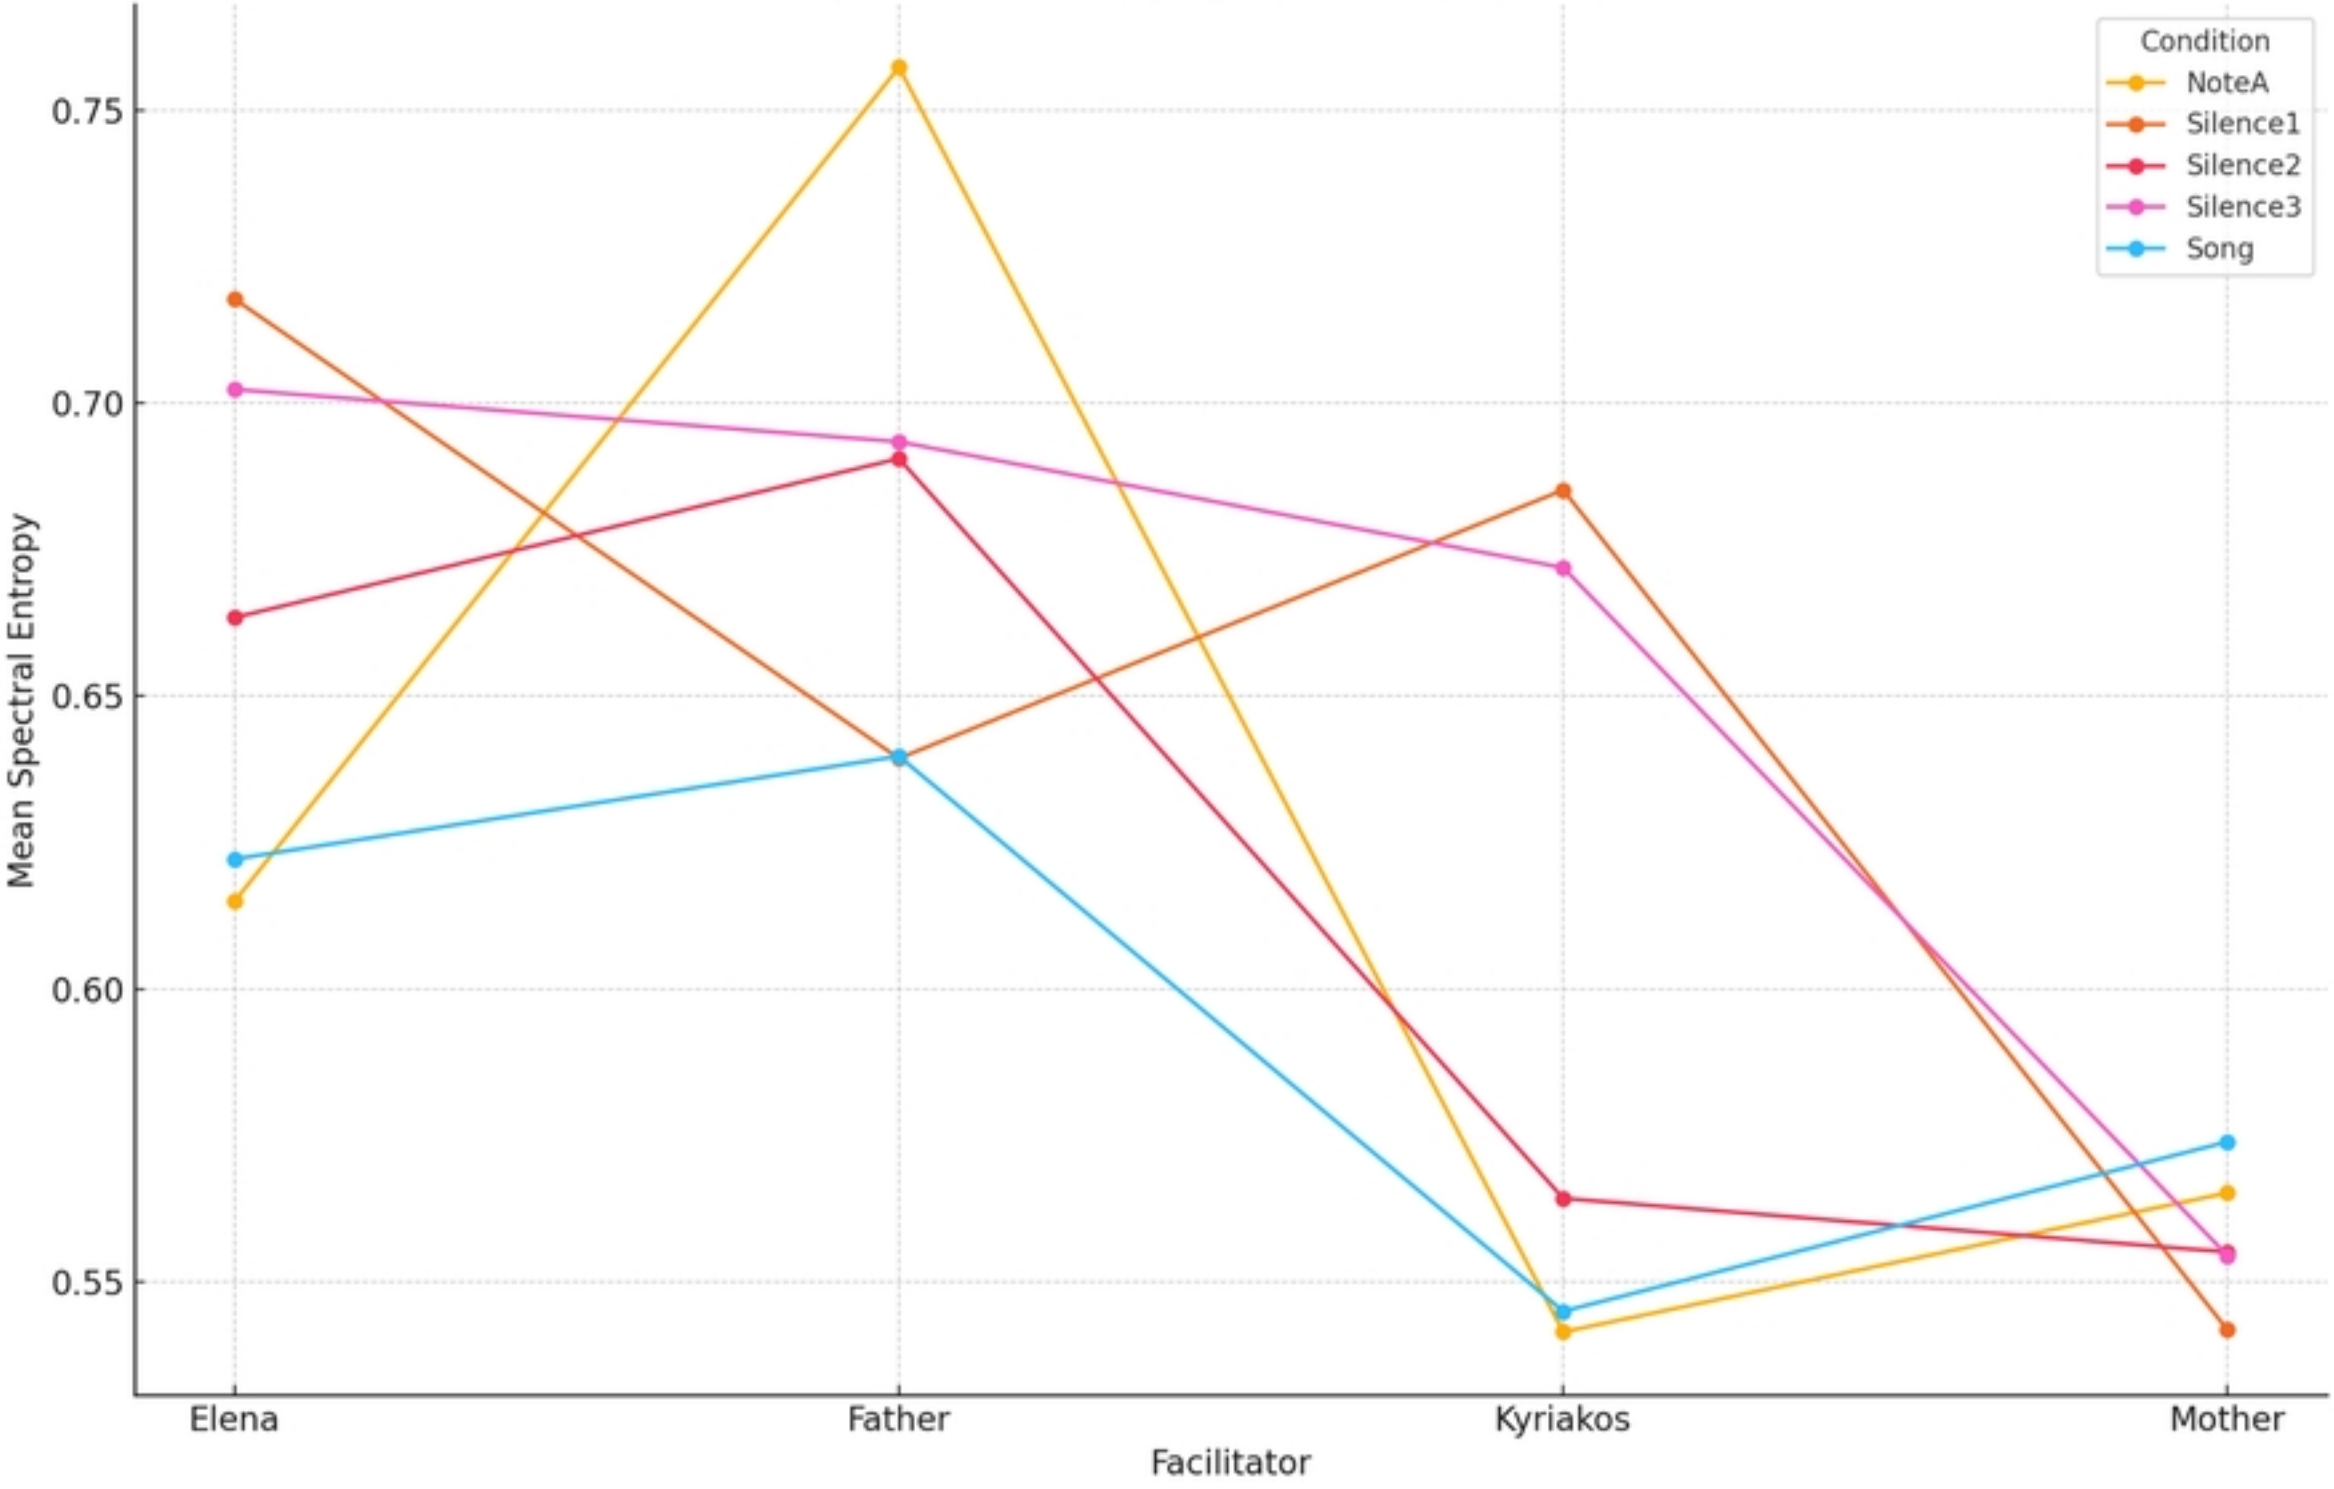

Figure 6





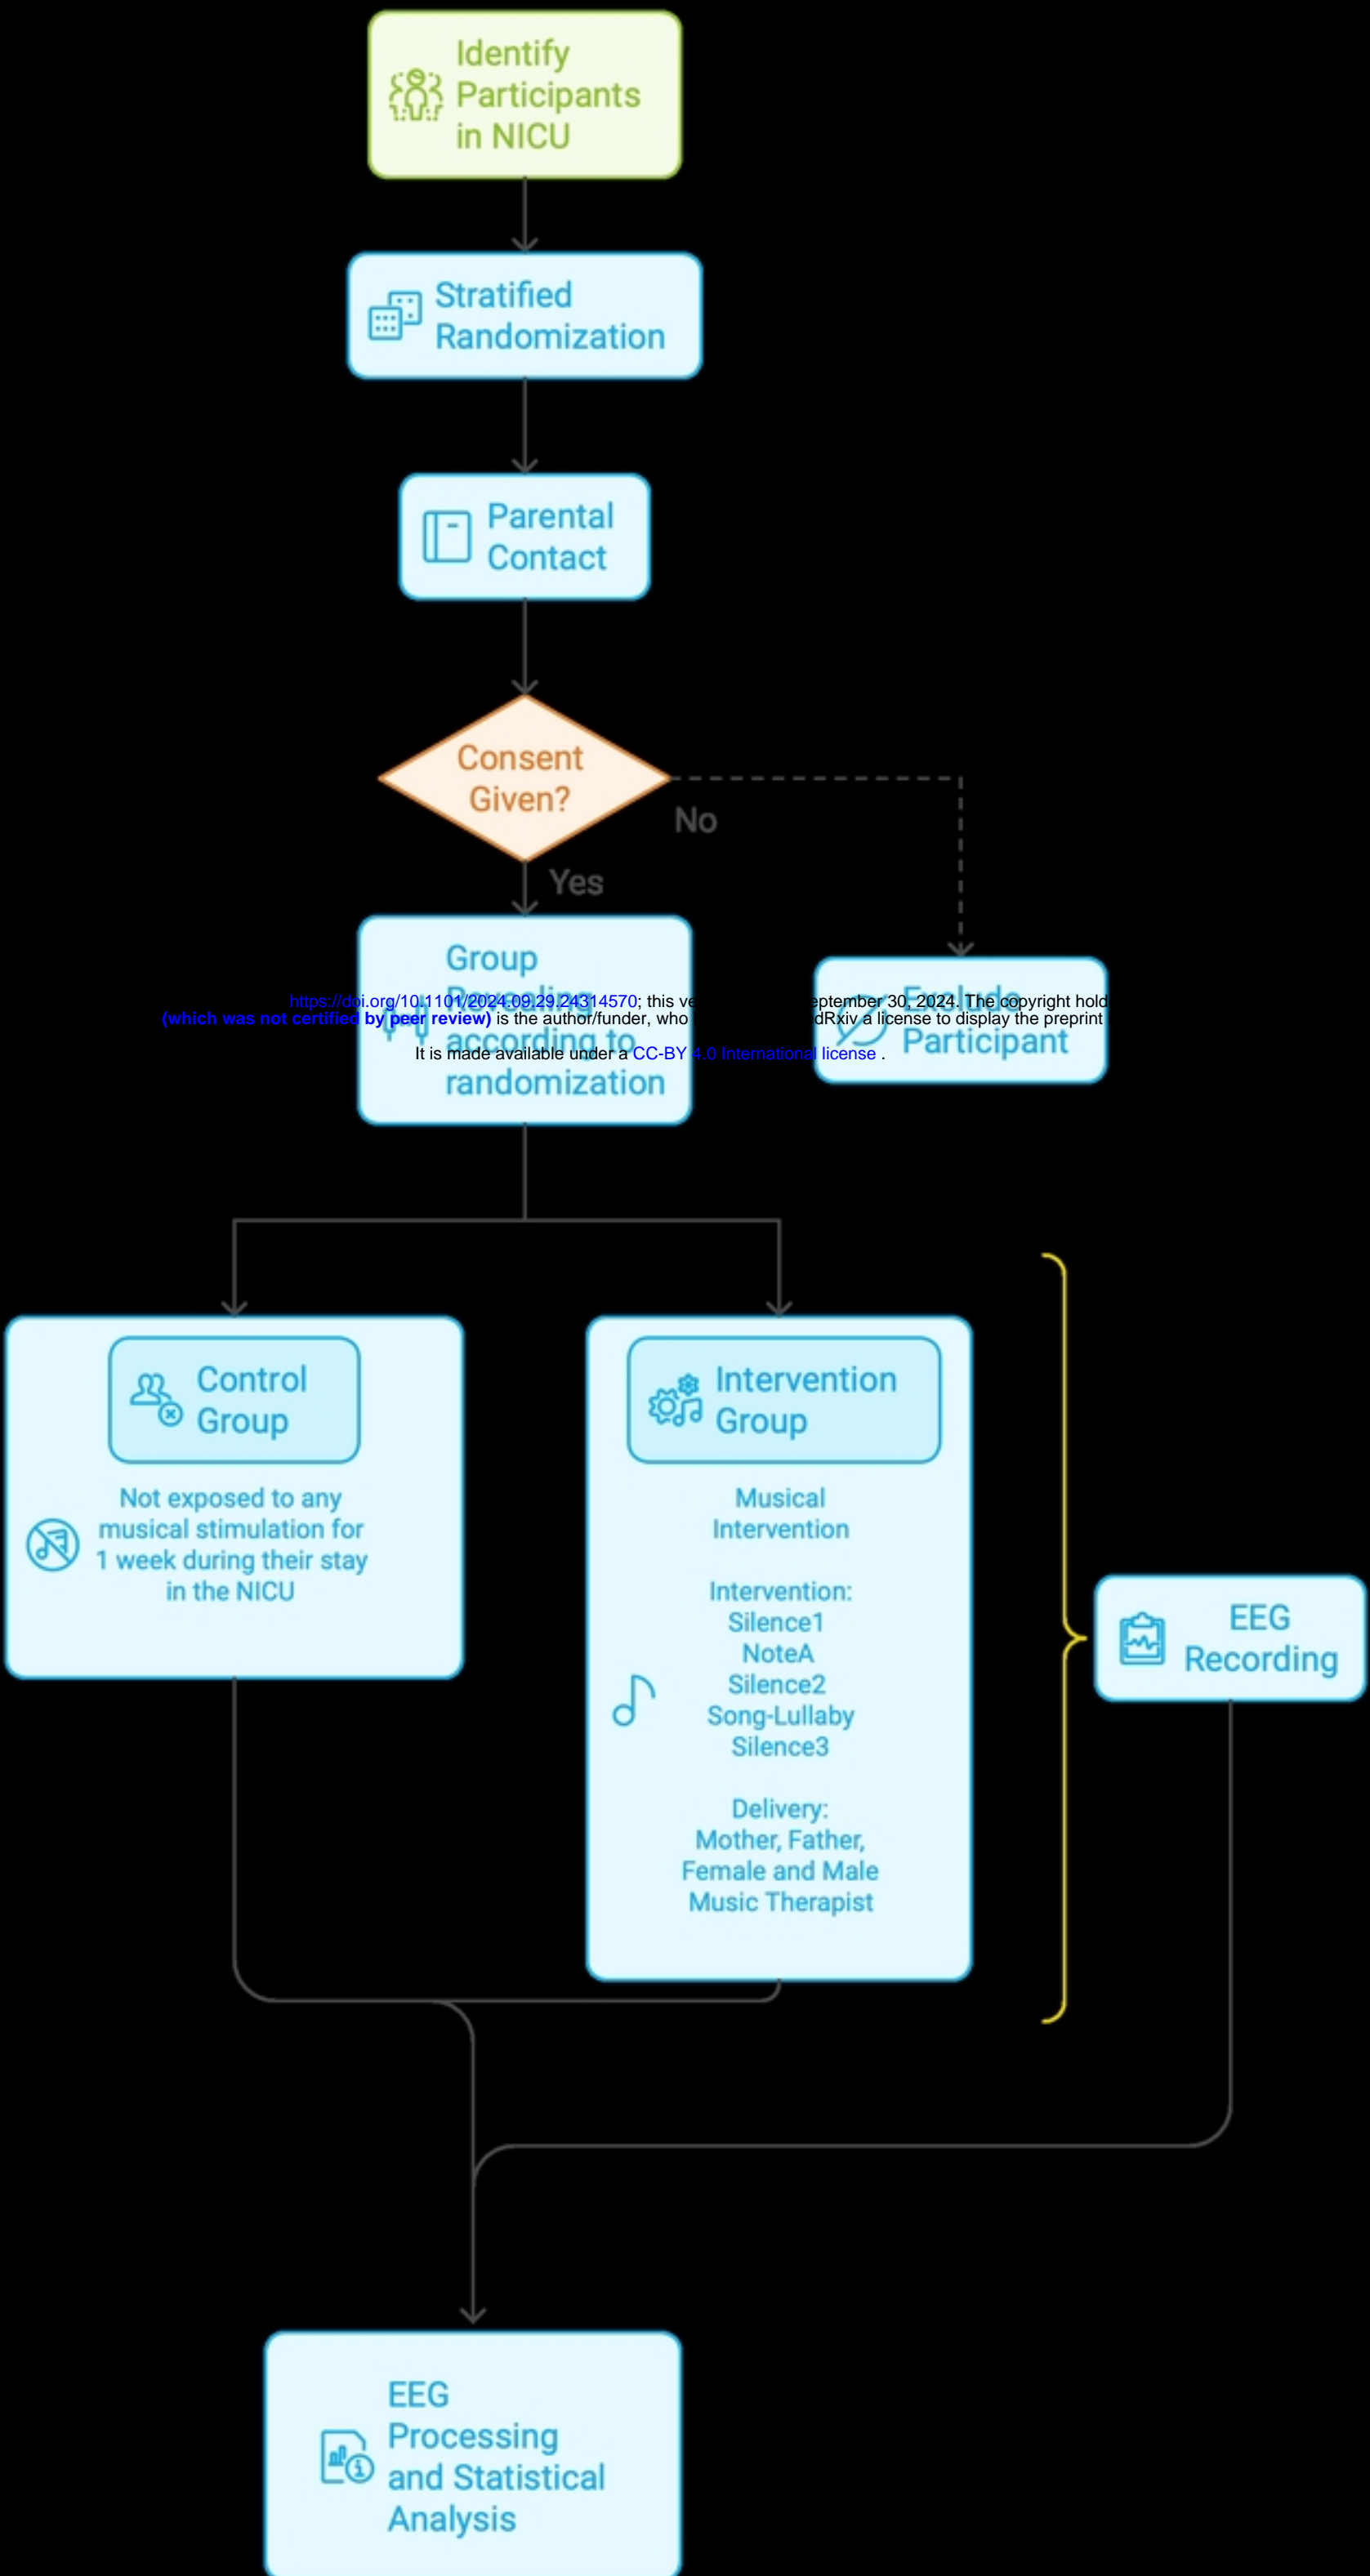

Figure 2
